# Supplementary material for: Hormonal contraceptive use and Staphylococcus aureus nasal and throat carriage in a Norwegian youth population
Source: PubMed Central journal article supplement (PMC6611591; doi:10.1371/journal.pone.0218511), 2019-07-05
Supplement: pone.0218511.s002.pdf [file pone.0218511.s002.pdf]

# Model selection

## Final model

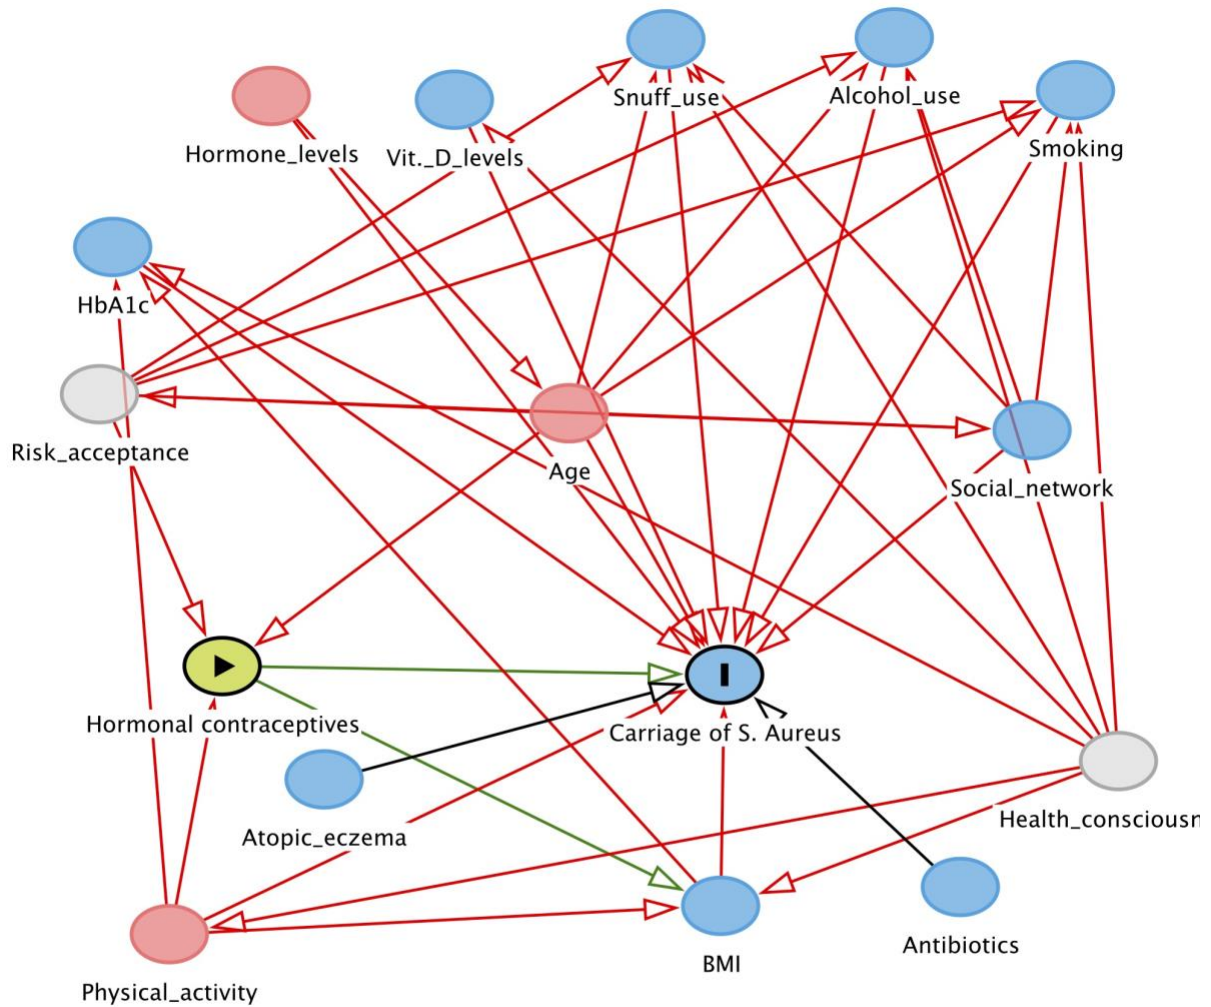

Minimal sufficient adjustment sets for estimating the direct effect of HC on carriage of S. aureus:  
Age, alcohol use, BMI, HbA1c, physical activity, smoking, snuff use, social network, vit. D levels

Directed Acyclic Graphs ([www.dagitty.net](http://www.dagitty.net)) of final model

### Likelihood Ratio Tests

| Effect                   | Model Fitting Criteria |                      |                                    | Likelihood Ratio Tests |    |      |
|--------------------------|------------------------|----------------------|------------------------------------|------------------------|----|------|
|                          | AIC of Reduced Model   | BIC of Reduced Model | -2 Log Likelihood of Reduced Model | Chi-Square             | df | Sig. |
| Intercept                | 511,646                | 574,898              | 479,646 <sup>a</sup>               | ,000                   | 0  | .    |
| AGE_FF2                  | 510,426                | 569,725              | 480,426                            | ,780                   | 1  | ,377 |
| bmi_ff2                  | 509,710                | 569,009              | 479,710                            | ,064                   | 1  | ,800 |
| S_25_VITD_FF2            | 509,655                | 568,954              | 479,655                            | ,009                   | 1  | ,925 |
| S_HBA1C_FF2              | 512,321                | 571,620              | 482,321                            | 2,675                  | 1  | ,102 |
| SMOKE_GROUPS             | 514,214                | 573,513              | 484,214                            | 4,568                  | 1  | ,033 |
| SNUFF_GROUPS             | 511,314                | 570,613              | 481,314                            | 1,668                  | 1  | ,197 |
| ALCOHOL_GROUPS           | 514,670                | 566,062              | 488,670                            | 9,024                  | 3  | ,029 |
| PHYS_ACT_GROUPS          | 512,482                | 567,828              | 484,482                            | 4,836                  | 2  | ,089 |
| ANTIBIOTICS_GROUPS       | 509,826                | 569,125              | 479,826                            | ,180                   | 1  | ,671 |
| ATOPIC_ECZEMA            | 517,317                | 576,616              | 487,317                            | 7,671                  | 1  | ,006 |
| HORMONAL_CONTRACEPTIVES2 | 524,862                | 580,208              | 496,862                            | 17,216                 | 2  | ,000 |

The chi-square statistic is the difference in -2 log-likelihoods between the final model and a reduced model. The reduced model is formed by omitting an effect from the final model. The null hypothesis is that all parameters of that effect are 0.

- a. This reduced model is equivalent to the final model because omitting the effect does not increase the degrees of freedom.

Akaike Information Criteria (AIC) of final model for nasal carriage

### Likelihood Ratio Tests

| Effect                        | Model Fitting Criteria |                      |                                    | Likelihood Ratio Tests |    |      |
|-------------------------------|------------------------|----------------------|------------------------------------|------------------------|----|------|
|                               | AIC of Reduced Model   | BIC of Reduced Model | -2 Log Likelihood of Reduced Model | Chi-Square             | df | Sig. |
| Intercept                     | 528,996                | 592,372              | 496,996 <sup>a</sup>               | ,000                   | 0  | .    |
| S_25_VITD_FF2                 | 529,679                | 589,094              | 499,679                            | 2,683                  | 1  | ,101 |
| S_HBA1C_FF2                   | 531,088                | 590,503              | 501,088                            | 4,092                  | 1  | ,043 |
| bmi_ff2                       | 527,612                | 587,027              | 497,612                            | ,616                   | 1  | ,433 |
| AGE_FF2                       | 527,137                | 586,552              | 497,137                            | ,141                   | 1  | ,707 |
| HORMONAL_CONTRACEPTIVE_GROUP2 | 527,022                | 582,476              | 499,022                            | 2,026                  | 2  | ,363 |
| ATOPIC_ECZEMA                 | 527,254                | 586,669              | 497,254                            | ,257                   | 1  | ,612 |
| ANTIBIOTICS                   | 531,893                | 591,308              | 501,893                            | 4,896                  | 1  | ,027 |
| SMOKE_GROUPS                  | 527,475                | 586,891              | 497,475                            | ,479                   | 1  | ,489 |
| SNUFF_GROUPS                  | 528,160                | 587,575              | 498,160                            | 1,164                  | 1  | ,281 |
| ALCOHOL_GROUPS                | 532,211                | 583,705              | 506,211                            | 9,215                  | 3  | ,027 |
| PHYS_ACT_GROUPS               | 528,773                | 584,227              | 500,773                            | 3,777                  | 2  | ,151 |

The chi-square statistic is the difference in -2 log-likelihoods between the final model and a reduced model. The reduced model is formed by omitting an effect from the final model. The null hypothesis is that all parameters of that effect are 0.

- a. This reduced model is equivalent to the final model because omitting the effect does not increase the degrees of freedom.

Akaike Information Criteria (AIC) of final model for throat carriage
