# Supplementary material for: Hormonal contraceptive use and Staphylococcus aureus nasal and throat carriage in a Norwegian youth population
Source: PubMed Central journal article supplement (PMC6611591; doi:10.1371/journal.pone.0218511), 2019-07-05
Supplement: pone.0218511.s003.pdf [file pone.0218511.s003.pdf]

# FF2 Generelt spørreskjema - UKE 1

Vi ønsker å vite mer om livsstil og helse.

Bruk den tiden du trenger til å svare så presist du kan.

Alle svarene dine blir behandlet med taushetsplikt.

Bruk "neste >>" og "<< tilbake" - knappene i skjema for å bla deg fremover og bakover.

Lykke til og tusen takk for hjelpen!

## DEG OG DIN FAMILIE

1) Er du:

Jente     Gutt

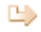**2) Hvem bor du sammen med nå? (sett ett eller flere kryss)**

- Mor
- Far
- 1-2 søsken
- 3 eller flere søsken
- Mors nye mann/samboer
- Fars nye kone/samboer
- Fosterforeldre
- Adoptivforeldre
- Besteforeldre
- Venner
- Alene/på hybel
- Institusjon
- Samboer/gift
- Annet

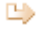

## Denne informasjonen vises kun i forhåndsvisningen

Følgende betingelser må være oppfylt for at spørsmålet skal vises for respondenten:

Dersom spørsmålet "Hvem bor du sammen med nå? (sett ett eller flere kryss)" inneholder noen av disse alternativene

- "Institusjon"
- "Alene/på hybel"
- "Venner"

### 3) Hvor lenge er det siden du flyttet hjemmefra?

- Mindre enn 6 måneder
- 6 - 11 måneder
- 1 - 2 år
- Mer enn 2 år

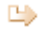**4) Er moren din i arbeid? (sett ett eller flere kryss)**

- Ja, heltid
- Ja, deltid
- Arbeidsledig
- Uførerygdet
- Hjemmeværende
- Går på skole, kurs, e.l.
- Pensjonist
- Mor er død
- Vet ikke
- Annet

**5) Er faren din i arbeid? (sett ett eller flere kryss)**

- Ja, heltid
- Ja, deltid
- Arbeidsledig
- Uførerygdet
- Hjemmeværende
- Går på skole, kurs, e.l.
- Pensjonist
- Far er død
- Vet ikke
- Annet

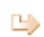

**6) Har du noen gang oppholdt deg 4 uker eller mer sammenhengende i Australia, USA, Argentina eller Sør-Afrika?**

- Ja     Nei

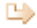

## Denne informasjonen vises kun i forhåndsvisningen

Følgende betingelser må være oppfylt for at spørsmålet skal vises for respondenten:

Dersom spørsmålet "Har du noen gang oppholdt deg 4 uker eller mer sammenhengende i Australia, USA, Argentina eller Sør-Afrika?" inneholder noen av disse alternativene

- "Ja"

Hvis det har vært flere opphold, oppgi varighet av siste opphold.

### 7) Hvor lenge varte det siste oppholdet?

- Mindre enn 2 måneder
- 2-6 måneder
- Mer enn 6 måneder

## Denne informasjonen vises kun i forhåndsvisningen

Følgende betingelser må være oppfylt for at spørsmålet skal vises for respondenten:

Dersom spørsmålet "Har du noen gang oppholdt deg 4 uker eller mer sammenhengende i Australia, USA, Argentina eller Sør-Afrika?" inneholder noen av disse alternativene

- "Ja"

Hvis det har vært flere opphold, oppgi når du hadde siste opphold.

**8) Når var det siste oppholdet?**

- Før 1990
- 1991
- 1992
- 1993
- 1994
- 1995
- 1996
- 1997
- 1998
- 1999
- 2000
- 2001
- 2002
- 2003
- 2004
- 2005
- 2006
- 2007
- 2008
- 2009
- 2010
- 2011
- 2012
- 2013

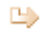

### 9) Er du i dag?

- Elev i videregående skole
- Lærling/elev i bedrift
- Ikke i videregående opplæring





## Denne informasjonen vises kun i forhåndsvisningen

Følgende betingelser må være oppfylt for at spørsmålet skal vises for respondenten:

Dersom spørsmålet "Er du i dag?" inneholder noen av disse alternativene

- "Lærling/elev i bedrift"
- "Elev i videregående skole"

### VENNER OG SKOLE

10) Har du vurdert å avbryte eller ta pause fra den videregående opplæringen du er i gang med?

- Ja     Nei

## Denne informasjonen vises kun i forhåndsvisningen

Følgende betingelser må være oppfylt for at spørsmålet skal vises for respondenten:

Dersom spørsmålet "Er du i dag?" inneholder noen av disse alternativene

- "Lærling/elev i bedrift"
- "Elev i videregående skole"

11) Hvor sannsynlig er det at du fullfører den utdanningen du er i gang med?

- Liten - kommer til å slutte
- God - kommer sannsynligvis til å fullføre
- Stor - Kommer helt sikkert til å fullføre
- Vet ikke

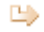

**12) Hvor mange tekstmeldinger (SMS/MMS) sendte du med mobiltelefon i går?**

- Ingen
- 1-5 meldinger
- 6-10 meldinger
- 11-20 meldinger
- 21-50 meldinger
- Mer enn 50 meldinger

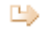

**13) Nedenfor er det noen spørsmål om hvordan du synes du selv er. Kryss av for det som passer best for deg.**

|                                               | Stemmer<br>svært<br>dårlig | Stemmer<br>nokså<br>dårlig | Stemmer<br>nokså<br>godt | Stemmer<br>svært<br>godt |
|-----------------------------------------------|----------------------------|----------------------------|--------------------------|--------------------------|
| Jeg synes det er ganske vanskelig å få venner | <input type="radio"/>      | <input type="radio"/>      | <input type="radio"/>    | <input type="radio"/>    |
| Jeg har mange venner                          | <input type="radio"/>      | <input type="radio"/>      | <input type="radio"/>    | <input type="radio"/>    |
| Andre ungdommer har vanskelig for å like meg  | <input type="radio"/>      | <input type="radio"/>      | <input type="radio"/>    | <input type="radio"/>    |
| Jeg er populær blant jevnaldrende             | <input type="radio"/>      | <input type="radio"/>      | <input type="radio"/>    | <input type="radio"/>    |
| Jeg føler at jevnaldrende godtar meg          | <input type="radio"/>      | <input type="radio"/>      | <input type="radio"/>    | <input type="radio"/>    |

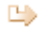

## **HELSE**

### **14) Hvordan vurderer du din egen helse sånn i alminnelighet?**

- Meget god
- God
- Verken god eller dårlig
- Dårlig
- Meget dårlig

### **15) Hvor ofte har du i løpet av de siste 4 ukene brukt følgende medisiner?**

|                                                                 | Ikke<br>brukt<br>siste<br>4<br>uker | Sjeldnere<br>enn hver<br>uke | Hver<br>uke,<br>men<br>ikke<br>daglig | Daglig                |
|-----------------------------------------------------------------|-------------------------------------|------------------------------|---------------------------------------|-----------------------|
| Smertestillende på resept (f. eks. Paralgin forte, Pinex forte) | <input type="radio"/>               | <input type="radio"/>        | <input type="radio"/>                 | <input type="radio"/> |
| Smertestillende uten resept (f. eks. Paracet, Pinex, Ibux)      | <input type="radio"/>               | <input type="radio"/>        | <input type="radio"/>                 | <input type="radio"/> |
| Sovemidler                                                      | <input type="radio"/>               | <input type="radio"/>        | <input type="radio"/>                 | <input type="radio"/> |
| Medisin mot depresjon                                           | <input type="radio"/>               | <input type="radio"/>        | <input type="radio"/>                 | <input type="radio"/> |
| Medisiner mot ADHD                                              | <input type="radio"/>               | <input type="radio"/>        | <input type="radio"/>                 | <input type="radio"/> |
| Beroligende medisiner                                           | <input type="radio"/>               | <input type="radio"/>        | <input type="radio"/>                 | <input type="radio"/> |

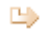**16) Har en lege noen gang sagt at du har...**

|                                 | Vet                   |                       |                       |
|---------------------------------|-----------------------|-----------------------|-----------------------|
|                                 | Ja                    | Nei                   | ikke                  |
| høysnue eller neseallergi?      | <input type="radio"/> | <input type="radio"/> | <input type="radio"/> |
| astma?                          | <input type="radio"/> | <input type="radio"/> | <input type="radio"/> |
| barneeksem eller atopisk eksem? | <input type="radio"/> | <input type="radio"/> | <input type="radio"/> |
| psoriasis?                      | <input type="radio"/> | <input type="radio"/> | <input type="radio"/> |



## PSYKISKE VANSKER

**17) Har du gått i behandling hos psykolog, psykiater eller PP-tjenesten det siste året?**

- Ja     Nei

**18) Under finner du en liste over ulike problemer. Har du opplevd noe av dette den siste uken (til og med i dag)?**

|                                              | Ikke plaget           | Litt plaget           | Ganske mye            | Veldig mye            |
|----------------------------------------------|-----------------------|-----------------------|-----------------------|-----------------------|
| Plutselig frykt uten grunn                   | <input type="radio"/> | <input type="radio"/> | <input type="radio"/> | <input type="radio"/> |
| Føler deg redd eller engstelig               | <input type="radio"/> | <input type="radio"/> | <input type="radio"/> | <input type="radio"/> |
| Matthet eller svimmelhet                     | <input type="radio"/> | <input type="radio"/> | <input type="radio"/> | <input type="radio"/> |
| Føler deg anspent eller oppjaget             | <input type="radio"/> | <input type="radio"/> | <input type="radio"/> | <input type="radio"/> |
| Lett for å klandre deg selv                  | <input type="radio"/> | <input type="radio"/> | <input type="radio"/> | <input type="radio"/> |
| Søvnproblemer                                | <input type="radio"/> | <input type="radio"/> | <input type="radio"/> | <input type="radio"/> |
| Nedtrykt, tungsindig                         | <input type="radio"/> | <input type="radio"/> | <input type="radio"/> | <input type="radio"/> |
| Følelse av å være unyttig, lite verdt        | <input type="radio"/> | <input type="radio"/> | <input type="radio"/> | <input type="radio"/> |
| Følelse av at alt er et slit                 | <input type="radio"/> | <input type="radio"/> | <input type="radio"/> | <input type="radio"/> |
| Følelse av håpløshet med hensyn til framtida | <input type="radio"/> | <input type="radio"/> | <input type="radio"/> | <input type="radio"/> |



**19) De følgende spørsmålene handler om hva du følte og gjorde de siste to ukene.**

|                                                                        | Ikke riktig           | Noen ganger riktig    | Riktig                |
|------------------------------------------------------------------------|-----------------------|-----------------------|-----------------------|
| Jeg var lei meg eller ulykkelig                                        | <input type="radio"/> | <input type="radio"/> | <input type="radio"/> |
| Jeg følte meg så trøtt at jeg bare ble sittende uten å gjøre noen ting | <input type="radio"/> | <input type="radio"/> | <input type="radio"/> |
| Jeg var veldig rastløs                                                 | <input type="radio"/> | <input type="radio"/> | <input type="radio"/> |
| Jeg var ikke glad for noe                                              | <input type="radio"/> | <input type="radio"/> | <input type="radio"/> |
| Jeg følte meg lite verdt                                               | <input type="radio"/> | <input type="radio"/> | <input type="radio"/> |
| Jeg gråt mye                                                           | <input type="radio"/> | <input type="radio"/> | <input type="radio"/> |
| Jeg hatet meg selv                                                     | <input type="radio"/> | <input type="radio"/> | <input type="radio"/> |
| Jeg tenkte at jeg aldri kunne bli så god som andre ungdommer           | <input type="radio"/> | <input type="radio"/> | <input type="radio"/> |
| Jeg følte meg ensom                                                    | <input type="radio"/> | <input type="radio"/> | <input type="radio"/> |
| Jeg tenkte at ingen egentlig var glad i meg                            | <input type="radio"/> | <input type="radio"/> | <input type="radio"/> |
| Jeg følte meg som et dårlig menneske                                   | <input type="radio"/> | <input type="radio"/> | <input type="radio"/> |
| Jeg gjorde alt galt                                                    | <input type="radio"/> | <input type="radio"/> | <input type="radio"/> |
| Jeg syntes det var vanskelig å tenke klart eller å konsentrere meg     | <input type="radio"/> | <input type="radio"/> | <input type="radio"/> |





De følgende spørsmålene handler om hvordan du ser på deg selv.

## 20) Jeg ser på meg selv som en som...

|                                           | Svært uenig           |                       |                       |                       |                       | Svært enig            |
|-------------------------------------------|-----------------------|-----------------------|-----------------------|-----------------------|-----------------------|-----------------------|
|                                           | 1                     | 2                     | 3                     | 4                     | 5                     | 6                     |
| Er pratsom                                | <input type="radio"/> | <input type="radio"/> | <input type="radio"/> | <input type="radio"/> | <input type="radio"/> | <input type="radio"/> |
| Har en tendens til å finne feil med andre | <input type="radio"/> | <input type="radio"/> | <input type="radio"/> | <input type="radio"/> | <input type="radio"/> | <input type="radio"/> |
| Gjør en grundig jobb                      | <input type="radio"/> | <input type="radio"/> | <input type="radio"/> | <input type="radio"/> | <input type="radio"/> | <input type="radio"/> |
| Er deprimeret, nedstemt                   | <input type="radio"/> | <input type="radio"/> | <input type="radio"/> | <input type="radio"/> | <input type="radio"/> | <input type="radio"/> |
| Er original, kommer med nye ideer         | <input type="radio"/> | <input type="radio"/> | <input type="radio"/> | <input type="radio"/> | <input type="radio"/> | <input type="radio"/> |
| Er reservert                              | <input type="radio"/> | <input type="radio"/> | <input type="radio"/> | <input type="radio"/> | <input type="radio"/> | <input type="radio"/> |
| Er hjelpsom og uegoistisk ovenfor andre   | <input type="radio"/> | <input type="radio"/> | <input type="radio"/> | <input type="radio"/> | <input type="radio"/> | <input type="radio"/> |
| Kan være uforsiktig                       | <input type="radio"/> | <input type="radio"/> | <input type="radio"/> | <input type="radio"/> | <input type="radio"/> | <input type="radio"/> |
| Er avslappet, takler stress godt          | <input type="radio"/> | <input type="radio"/> | <input type="radio"/> | <input type="radio"/> | <input type="radio"/> | <input type="radio"/> |
| Er nysgjerrig på mange ting               | <input type="radio"/> | <input type="radio"/> | <input type="radio"/> | <input type="radio"/> | <input type="radio"/> | <input type="radio"/> |
| Er full av energi                         | <input type="radio"/> | <input type="radio"/> | <input type="radio"/> | <input type="radio"/> | <input type="radio"/> | <input type="radio"/> |
| Er en kranglefant                         | <input type="radio"/> | <input type="radio"/> | <input type="radio"/> | <input type="radio"/> | <input type="radio"/> | <input type="radio"/> |
| Er pålitelig i arbeidet mitt              | <input type="radio"/> | <input type="radio"/> | <input type="radio"/> | <input type="radio"/> | <input type="radio"/> | <input type="radio"/> |
| Kan være anspent                          | <input type="radio"/> | <input type="radio"/> | <input type="radio"/> | <input type="radio"/> | <input type="radio"/> | <input type="radio"/> |
| Er skarpsindig, tenker dypt               | <input type="radio"/> | <input type="radio"/> | <input type="radio"/> | <input type="radio"/> | <input type="radio"/> | <input type="radio"/> |
| Skaper mye entusiasme                     | <input type="radio"/> | <input type="radio"/> | <input type="radio"/> | <input type="radio"/> | <input type="radio"/> | <input type="radio"/> |
| Er tilgivende av natur                    | <input type="radio"/> | <input type="radio"/> | <input type="radio"/> | <input type="radio"/> | <input type="radio"/> | <input type="radio"/> |
| Har en tendens til å være ustrukturert    | <input type="radio"/> | <input type="radio"/> | <input type="radio"/> | <input type="radio"/> | <input type="radio"/> | <input type="radio"/> |
| Bekymrer meg mye                          | <input type="radio"/> | <input type="radio"/> | <input type="radio"/> | <input type="radio"/> | <input type="radio"/> | <input type="radio"/> |
| Har livlig fantasi                        | <input type="radio"/> | <input type="radio"/> | <input type="radio"/> | <input type="radio"/> | <input type="radio"/> | <input type="radio"/> |
| Har en tendens til å være stillferdig     | <input type="radio"/> | <input type="radio"/> | <input type="radio"/> | <input type="radio"/> | <input type="radio"/> | <input type="radio"/> |
| Er tillitsfull                            | <input type="radio"/> | <input type="radio"/> | <input type="radio"/> | <input type="radio"/> | <input type="radio"/> | <input type="radio"/> |



De følgende spørsmålene handler om hvordan du ser på deg selv.

## 21) Jeg ser på meg selv som en som...

|                                             | Svært uenig           |                       |                       |                       |                       | Svært enig            |
|---------------------------------------------|-----------------------|-----------------------|-----------------------|-----------------------|-----------------------|-----------------------|
|                                             | 1                     | 2                     | 3                     | 4                     | 5                     | 6                     |
| Har en tendens til å være lat               | <input type="radio"/> | <input type="radio"/> | <input type="radio"/> | <input type="radio"/> | <input type="radio"/> | <input type="radio"/> |
| Er følelsesmessig stabil                    | <input type="radio"/> | <input type="radio"/> | <input type="radio"/> | <input type="radio"/> | <input type="radio"/> | <input type="radio"/> |
| Er oppfinnsom                               | <input type="radio"/> | <input type="radio"/> | <input type="radio"/> | <input type="radio"/> | <input type="radio"/> | <input type="radio"/> |
| Er selvhevdende                             | <input type="radio"/> | <input type="radio"/> | <input type="radio"/> | <input type="radio"/> | <input type="radio"/> | <input type="radio"/> |
| Kan være kald og fjern                      | <input type="radio"/> | <input type="radio"/> | <input type="radio"/> | <input type="radio"/> | <input type="radio"/> | <input type="radio"/> |
| Står på til oppgaven er gjennomført         | <input type="radio"/> | <input type="radio"/> | <input type="radio"/> | <input type="radio"/> | <input type="radio"/> | <input type="radio"/> |
| Kan være humørsyk                           | <input type="radio"/> | <input type="radio"/> | <input type="radio"/> | <input type="radio"/> | <input type="radio"/> | <input type="radio"/> |
| Setter pris på skjønnhet og kunst           | <input type="radio"/> | <input type="radio"/> | <input type="radio"/> | <input type="radio"/> | <input type="radio"/> | <input type="radio"/> |
| Kan være sjenert og hemmet                  | <input type="radio"/> | <input type="radio"/> | <input type="radio"/> | <input type="radio"/> | <input type="radio"/> | <input type="radio"/> |
| Er hensynsfull og vennlig ovenfor de fleste | <input type="radio"/> | <input type="radio"/> | <input type="radio"/> | <input type="radio"/> | <input type="radio"/> | <input type="radio"/> |
| Gjør ting effektivt                         | <input type="radio"/> | <input type="radio"/> | <input type="radio"/> | <input type="radio"/> | <input type="radio"/> | <input type="radio"/> |
| Beholder roen i spente situasjoner          | <input type="radio"/> | <input type="radio"/> | <input type="radio"/> | <input type="radio"/> | <input type="radio"/> | <input type="radio"/> |
| Foretrekker rutinearbeid                    | <input type="radio"/> | <input type="radio"/> | <input type="radio"/> | <input type="radio"/> | <input type="radio"/> | <input type="radio"/> |
| Er utadvendt og sosial                      | <input type="radio"/> | <input type="radio"/> | <input type="radio"/> | <input type="radio"/> | <input type="radio"/> | <input type="radio"/> |
| Kan noen ganger være uhøflig                | <input type="radio"/> | <input type="radio"/> | <input type="radio"/> | <input type="radio"/> | <input type="radio"/> | <input type="radio"/> |
| Legger planer og gjennomfører dem           | <input type="radio"/> | <input type="radio"/> | <input type="radio"/> | <input type="radio"/> | <input type="radio"/> | <input type="radio"/> |
| Blir lett nervøs                            | <input type="radio"/> | <input type="radio"/> | <input type="radio"/> | <input type="radio"/> | <input type="radio"/> | <input type="radio"/> |
| Liker å tenke, leke med ideer               | <input type="radio"/> | <input type="radio"/> | <input type="radio"/> | <input type="radio"/> | <input type="radio"/> | <input type="radio"/> |
| Har få kunstneriske interesser              | <input type="radio"/> | <input type="radio"/> | <input type="radio"/> | <input type="radio"/> | <input type="radio"/> | <input type="radio"/> |
| Liker å samarbeide                          | <input type="radio"/> | <input type="radio"/> | <input type="radio"/> | <input type="radio"/> | <input type="radio"/> | <input type="radio"/> |
| Blir lett distraheret                       | <input type="radio"/> | <input type="radio"/> | <input type="radio"/> | <input type="radio"/> | <input type="radio"/> | <input type="radio"/> |
| Har kunnskaper om kunst, musikk, litteratur | <input type="radio"/> | <input type="radio"/> | <input type="radio"/> | <input type="radio"/> | <input type="radio"/> | <input type="radio"/> |



## Denne informasjonen vises kun i forhåndsvisningen

Følgende betingelser må være oppfylt for at spørsmålet skal vises for respondenten:

Dersom spørsmålet "Er du:" inneholder noen av disse alternativene

- "Jente"

### PUBERTET

Her har vi noen spørsmål om kroppslige forandringer som skjer gjennom ungdomstiden:

#### 22) Har du fått menstruasjon?

- Ja     Nei



## Denne informasjonen vises kun i forhåndsvisningen

Følgende betingelser må være oppfylt for at spørsmålet skal vises for respondenten:

Dersom spørsmålet "Har du fått menstruasjon?" inneholder noen av disse alternativene

- "Ja"

Hvor gammel var du da du fikk menstruasjon første gang?

### 23) År

- 7 år
- 8 år
- 9 år
- 10 år
- 11 år
- 12 år
- 13 år
- 14 år
- 15 år
- 16 år
- 17 år
- 18 år

Denne informasjonen vises kun i forhåndsvisningen

Følgende betingelser må være oppfylt for at spørsmålet skal vises for respondenten:

Dersom spørsmålet "Har du fått menstruasjon?" inneholder noen av disse alternativene

- "Ja"

## 24) Måneder

- 1 måned
- 2 måneder
- 3 måneder
- 4 måneder
- 5 måneder
- 6 måneder
- 7 måneder
- 8 måneder
- 9 måneder
- 10 måneder
- 11 måneder



## Denne informasjonen vises kun i forhåndsvisningen

Følgende betingelser må være oppfylt for at spørsmålet skal vises for respondenten:

Dersom spørsmålet "Har du fått menstruasjon?" inneholder noen av disse alternativene

- "Ja"

**25) Hvis du ser bort fra svangerskap, har du noen gang vært blødningsfri i minst 6 måneder?**

- Ja
- Nei



## Denne informasjonen vises kun i forhåndsvisningen

Følgende betingelser må være oppfylt for at spørsmålet skal vises for respondenten:

Dersom spørsmålet "Hvis du ser bort fra svangerskap, har du noen gang vært blødningsfri i minst 6 måneder?" inneholder noen av disse alternativene

- "Ja"

### 26) Hvor mange ganger har du vært blødningsfri i mer enn 6 måneder?

- 1-2
- 3-4
- 5-6
- 7-9
- 10 eller flere

## Denne informasjonen vises kun i forhåndsvisningen

Følgende betingelser må være oppfylt for at spørsmålet skal vises for respondenten:

Dersom spørsmålet "Hvis du ser bort fra svangerskap, har du noen gang vært blødningsfri i minst 6 måneder?" inneholder noen av disse alternativene

- "Ja"

**27) Hvordan er blødningene dine nå?**

- Jeg har regelmessige blødninger
- Jeg har uregelmessige blødninger
- Jeg har ikke hatt blødninger det siste året





## Denne informasjonen vises kun i forhåndsvisningen

Følgende betingelser må være oppfylt for at spørsmålet skal vises for respondenten:

Dersom spørsmålet "Er du:" inneholder noen av disse alternativene

- "Gutt"

### PUBERTET

**28) Når man er tenåring, er det perioder da man vokser raskt. Har du merket at kroppen din har vokst fort (blitt høyere)?**

- Nei, den har ikke begynt å vokse
- Ja, den har såvidt begynt å vokse
- Ja, den har helt tydelig begynt å vokse
- Ja, det virker som om jeg er ferdig med å vokse raskt

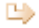

## Denne informasjonen vises kun i forhåndsvisningen

Følgende betingelser må være oppfylt for at spørsmålet skal vises for respondenten:

Dersom spørsmålet "Har du fått menstruasjon?" inneholder noen av disse alternativene

- "Nei"

**29) Og hva med hår på kroppen (under armene og i skrittet)? Vil du si at håret på kroppen din har:**

- Ikke begynt å vokse enda
- Såvidt begynt å vokse
- Helt tydelig begynt å vokse
- Det virker som om håret på kroppen er utvokst



## Denne informasjonen vises kun i forhåndsvisningen

Følgende betingelser må være oppfylt for at spørsmålet skal vises for respondenten:

Dersom spørsmålet "Er du:" inneholder noen av disse alternativene

- "Gutt"

og

Dersom spørsmålet "Og hva med hår på kroppen (under armene og i skrittet)? Vil du si at håret på kroppen din har: " inneholder noen av disse alternativene

- "Det virker som om håret på kroppen er utvokst"
- "Helt tydelig begynt å vokse"
- "Såvidt begynt å vokse"

### 30) Hvor gammel var du da du begynte å få hår i skrittet (kjønnshår)?

- 10 år eller yngre
- 11 år
- 12 år
- 13 år
- 14 år
- 15 år
- 16 år
- 17 år
- 18 år
- 19 år
- 20 år

- 21 år
- 22 år
- 23 år
- 24 år
- 25 år
- 26 år
- 27 år
- 28 år
- 29 år
- 30 år eller eldre



## Denne informasjonen vises kun i forhåndsvisningen

Følgende betingelser må være oppfylt for at spørsmålet skal vises for respondenten:

Dersom spørsmålet "Er du:" inneholder noen av disse alternativene

- "Gutt"

### 31) Har du begynt å komme i stemmeskifte?

- Nei, har ikke begynt ennå
- Ja, har såvidt begynt
- Ja, har helt tydelig begynt
- Det virker som om stemmeskifte er ferdig

## Denne informasjonen vises kun i forhåndsvisningen

Følgende betingelser må være oppfylt for at spørsmålet skal vises for respondenten:

Dersom spørsmålet "Er du:" inneholder noen av disse alternativene

- "Gutt"

### 32) Har du begynt å få bart eller skjegg?

- Nei, har ikke begynt ennå
- Ja, har såvidt begynt

- Ja, har helt tydelig begynt
- ja, har fått en god del skjeggvekst



## Denne informasjonen vises kun i forhåndsvisningen

Følgende betingelser må være oppfylt for at spørsmålet skal vises for respondenten:

Dersom spørsmålet "Er du:" inneholder noen av disse alternativene

- "Jente"

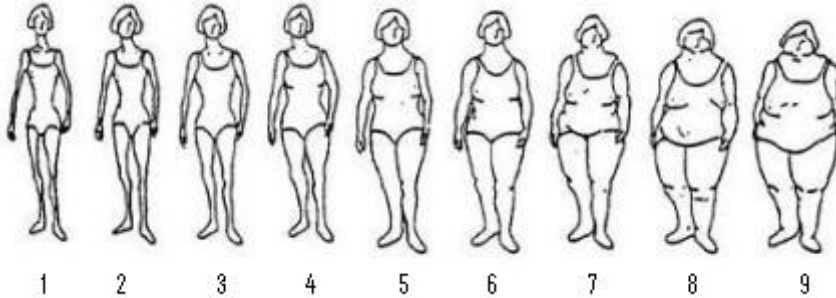

33) Hvilken av disse kroppsfasongene likner mest på din kropp slik du er idag?

- 1     2     3     4     5     6     7     8
- 9



## Denne informasjonen vises kun i forhåndsvisningen

Følgende betingelser må være oppfylt for at spørsmålet skal vises for respondenten:

Dersom spørsmålet "Er du:" inneholder noen av disse alternativene

- "Gutt"

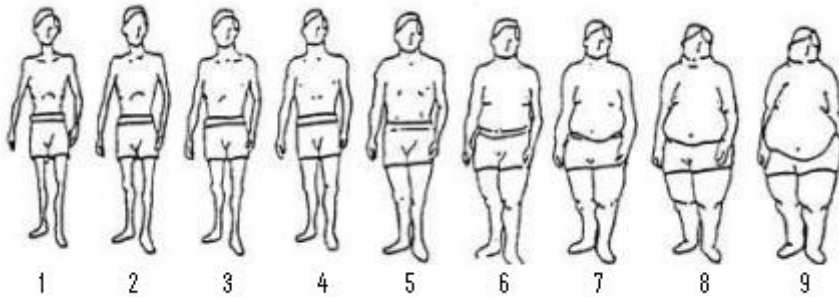

**34) Hvilken av disse kroppsfasongene likner mest på din kropp slik du er idag?**

- 1     2     3     4     5     6     7     8
- 9



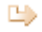

**35) Gjør du for tiden noe forsøk på å endre kroppsvekten din?**

- Nei
- Ja, jeg forsøker å legge på meg
- Ja, jeg forsøker å slanke meg



## Denne informasjonen vises kun i forhåndsvisningen

Følgende betingelser må være oppfylt for at spørsmålet skal vises for respondenten:

Dersom spørsmålet “Gjør du for tiden noe forsøk på å endre kroppsvekten din?” inneholder noen av disse alternativene

- “Ja, jeg forsøker å slanke meg”
- “Ja, jeg forsøker å legge på meg”

**36) Hvilken vekt vil du være fornøyd med (din trivselsvekt i hele kilo)?**

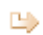

## **LIVSSTIL**

### **37) Røyker du?**

- Nei, aldri     Før, men ikke nå     Av og til     Daglig



## Denne informasjonen vises kun i forhåndsvisningen

Følgende betingelser må være oppfylt for at spørsmålet skal vises for respondenten:

Dersom spørsmålet "Røyker du?" inneholder noen av disse alternativene

- "Daglig"
- "Av og til"
- "Før, men ikke nå"

### 38) Hvor gammel var du da du først begynte å røyke?

- Under 12 år
- 12 år
- 13 år
- 14 år
- 15 år
- 16 år
- 17 år
- 18 år
- 19 år eller mer

## Denne informasjonen vises kun i forhåndsvisningen

Følgende betingelser må være oppfylt for at spørsmålet skal vises for respondenten:

Dersom spørsmålet "Røyker du?" inneholder noen av disse alternativene

- "Daglig"
- "Av og til"
- "Før, men ikke nå"

**39) Hvor mange sigaretter røyker/røkte du vanligvis i løpet av en uke?**

- 1 eller færre
- 2-3
- 4-6
- 7-10
- Mer enn 10

## Denne informasjonen vises kun i forhåndsvisningen

Følgende betingelser må være oppfylt for at spørsmålet skal vises for respondenten:

Dersom spørsmålet "Røyker du?" inneholder noen av disse alternativene

- "Daglig"
- "Av og til"
- "Før, men ikke nå"

**40) Hvor mange sigaretter røyker/røkte du vanligvis i løpet av en dag?**

- 1 eller færre
- 2-3
- 4-6

- 7-10
- Mer enn 10

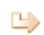**41) Bruker du snus eller skrå?**

- Nei, aldri     Før, men ikke nå     Av og til     Daglig



## Denne informasjonen vises kun i forhåndsvisningen

Følgende betingelser må være oppfylt for at spørsmålet skal vises for respondenten:

Dersom spørsmålet "Bruker du snus eller skrå?" inneholder noen av disse alternativene

- "Daglig"
- "Av og til"
- "Før, men ikke nå"

### 42) Hvor gammel var du da du først begynte å bruke snus eller skrå?

- Under 12 år
- 12 år
- 13 år
- 14 år
- 15 år
- 16 år
- 17 år
- 18 år
- 19 år eller mer

## Denne informasjonen vises kun i forhåndsvisningen

Følgende betingelser må være oppfylt for at spørsmålet skal vises for respondenten:



Dersom spørsmålet “Bruker du snus eller skrå?” inneholder noen av disse alternativene

- “Daglig”
- “Av og til”
- “Før, men ikke nå”

**43) Hvor mange priser snus/skrå bruker du vanligvis i løpet av en uke?**

- 1 eller færre
- 2-3
- 4-6
- 7-10
- Mer enn 10

**Denne informasjonen vises kun i forhåndsvisningen**

Følgende betingelser må være oppfylt for at spørsmålet skal vises for respondenten:

Dersom spørsmålet “Bruker du snus eller skrå?” inneholder noen av disse alternativene

- “Daglig”
- “Av og til”
- “Før, men ikke nå”

**44) Hvor mange priser snus/skrå bruker du per dag?**

- 1
- 2-3
- 4-6

- 7-10
- Mer enn 10

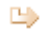**45) Hvor ofte drikker du alkohol?**

- Aldri
- 1 gang per måned eller sjeldnere
- 2-4 ganger per måned
- 2-3 ganger per uke
- 4 eller flere ganger per uke



## Denne informasjonen vises kun i forhåndsvisningen

Følgende betingelser må være oppfylt for at spørsmålet skal vises for respondenten:

Dersom spørsmålet "Hvor ofte drikker du alkohol?" inneholder noen av disse alternativene

- "4 eller flere ganger per uke"
- "2-3 ganger per uke"
- "2-4 ganger per måned"
- "1 gang per måned eller sjeldnere"

**46) Hvor mange enheter alkohol (en øl, ett glass vin eller en drink) tar du vanligvis når du drikker?**

- 1-2
- 3-4
- 5-6
- 7-9
- 10 eller flere

## Denne informasjonen vises kun i forhåndsvisningen

Følgende betingelser må være oppfylt for at spørsmålet skal vises for respondenten:

Dersom spørsmålet "Hvor ofte drikker du alkohol?" inneholder noen av disse alternativene

- "4 eller flere ganger per uke"
- "2-3 ganger per uke"
- "2-4 ganger per måned"

- “1 gang per måned eller sjeldnere”

**47) Hvor ofte drikker du 6 eller flere enheter alkohol ved en anledning?**

- Aldri
- Sjeldnere enn 1 gang per måned
- 1 gang per måned
- 1 gang per uke
- Daglig eller nesten daglig



## **FYSISK AKTIVITET**

**48) Hvilken beskrivelse passer best når det gjelder din fysiske aktivitet på fritiden det siste året?**

- Sitter ved PC/TV, leser eller annen stillesittende aktivitet.
- Går, sykler eller beveger deg på annen måte minst 4 timer i uken (her skal du også regne med tur til/fra skolen, shopping, søndagsturer med mer).
- Driver med idrett/trening, tyngre utearbeid, snømåking eller liknende minst 4 timer i uka.
- Trener hardt eller driver konkurranseidrett regelmessig og flere ganger i uka.

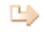

**49) Hvordan kommer du deg vanligvis til og fra skolen eller arbeid i sommerhalvåret?**

- Med bil, motorsykkel/moped
- Med buss
- Med sykkel
- Går
- Ikke i skole eller arbeid



## Denne informasjonen vises kun i forhåndsvisningen

Følgende betingelser må være oppfylt for at spørsmålet skal vises for respondenten:

Dersom spørsmålet "Hvordan kommer du deg vanligvis til og fra skolen eller arbeid i sommerhalvåret?" inneholder noen av disse alternativene

- "Går"
- "Med sykkel"
- "Med buss"
- "Med bil, motorsykkel/moped"

**50) Hvor lang tid bruker du vanligvis til og fra skolen eller arbeid (en vei) i sommerhalvåret?**

- Mindre enn 5 minutter
- 6 til 15 minutter
- 16 til 30 minutter
- 1/2 til 1 time
- Mer enn 1 time





## Denne informasjonen vises kun i forhåndsvisningen

Følgende betingelser må være oppfylt for at spørsmålet skal vises for respondenten:

Dersom spørsmålet "Hvordan kommer du deg vanligvis til og fra skolen eller arbeid i sommerhalvåret?" inneholder noen av disse alternativene

- "Går"
- "Med sykkel"
- "Med buss"
- "Med bil, motorsykkkel/moped"

### 51) Hvordan kommer du deg vanligvis til og fra skolen eller arbeid i vinterhalvåret?

- Med bil, motorsykkkel/moped
- Med buss
- Med sykkel
- Går (til fots eller på ski)

## Denne informasjonen vises kun i forhåndsvisningen

Følgende betingelser må være oppfylt for at spørsmålet skal vises for respondenten:

Dersom spørsmålet "Hvordan kommer du deg vanligvis til og fra skolen eller arbeid i sommerhalvåret?" inneholder noen av disse alternativene

- "Går"
- "Med sykkel"

- "Med buss"
- "Med bil, motorsykkel/moped"

**52) Hvor lang tid bruker du vanligvis til og fra skolen eller arbeid (en vei) i vinterhalvåret?**

- Mindre enn 5 minutter
- 6 til 15 minutter
- 16 til 30 minutter
- 1/2 til 1 time
- Mer enn 1 time



**53) Driver du med idrett eller fysisk aktivitet (f.eks. fotball, dans, løping, sykling, skateboard) utenom skoletid?**

- Ja     Nei



## Denne informasjonen vises kun i forhåndsvisningen

Følgende betingelser må være oppfylt for at spørsmålet skal vises for respondenten:

Dersom spørsmålet "Driver du med idrett eller fysisk aktivitet (f.eks. fotball, dans, løping, sykling, skateboard) utenom skoletid?"

inneholder noen av disse alternativene

- "Ja"

### 54) Hvor mange dager i uken driver du med idrett/fysisk aktivitet utenom skoletid?

- Sjeldnere enn 1 dag i uka
- 1 dag i uka
- 2-3 dager i uka
- 4-6 dager i uka
- Omtrent hver dag

## Denne informasjonen vises kun i forhåndsvisningen

Følgende betingelser må være oppfylt for at spørsmålet skal vises for respondenten:

Dersom spørsmålet "Driver du med idrett eller fysisk aktivitet (f.eks. fotball, dans, løping, sykling, skateboard) utenom skoletid?"

inneholder noen av disse alternativene

- "Ja"

**55) Omtrent hvor mange timer per uke bruker du til sammen på idrett/fysisk aktivitet utenom skoletid?**

- Omtrent 1/2 time
- Omtrent 1 - 1 1/2 time
- Omtrent 2 - 3 timer
- Omtrent 4 - 6 timer
- 7 timer eller mer

**Denne informasjonen vises kun i forhåndsvisningen**

Følgende betingelser må være oppfylt for at spørsmålet skal vises for respondenten:

Dersom spørsmålet "Driver du med idrett eller fysisk aktivitet (f.eks. fotball, dans, løping, sykling, skateboard) utenom skoletid?" inneholder noen av disse alternativene

- "Ja"

**56) Hvor slitsom er vanligvis idretten/aktiviteten du driver med utenom skoletid?**

- Ikke anstrengende
- Litt anstrengende
- Ganske anstrengende
- Meget anstrengende
- Svært anstrengende



**Utenom skoletid: Hvor mange timer per dag ser du på PC, TV, DVD og liknende?**

**57) Hverdager, antall timer per dag:**

- Ingen
- Omtrent 1/2 time
- Omtrent 1 - 1 1/2 time
- Omtrent 2 - 3 timer
- Omtrent 4 - 6 timer
- Omtrent 7 - 9 timer
- 10 timer eller mer

**58) Fridager (helg, helligdager, ferie), antall timer per dag:**

- Ingen
- Omtrent 1/2 time
- Omtrent 1 - 1 1/2 time
- Omtrent 2 - 3 timer
- Omtrent 4 - 6 timer
- Omtrent 7 - 9 timer
- 10 timer eller mer

**59) I hvilken grad har andre oppmuntret deg til å være fysisk aktiv**

|                    | Svært                 |                       |                       |                       |                       |
|--------------------|-----------------------|-----------------------|-----------------------|-----------------------|-----------------------|
|                    | sjelden/aldri         |                       |                       |                       | Svært                 |
|                    | 1                     | 2                     | 3                     | 4                     | ofte 5                |
| Foreldre/foresatte | <input type="radio"/> | <input type="radio"/> | <input type="radio"/> | <input type="radio"/> | <input type="radio"/> |
| Søsken             | <input type="radio"/> | <input type="radio"/> | <input type="radio"/> | <input type="radio"/> | <input type="radio"/> |
| Venner             | <input type="radio"/> | <input type="radio"/> | <input type="radio"/> | <input type="radio"/> | <input type="radio"/> |
| Trenere            | <input type="radio"/> | <input type="radio"/> | <input type="radio"/> | <input type="radio"/> | <input type="radio"/> |
| Gymlærere          | <input type="radio"/> | <input type="radio"/> | <input type="radio"/> | <input type="radio"/> | <input type="radio"/> |
| Nabolaget          | <input type="radio"/> | <input type="radio"/> | <input type="radio"/> | <input type="radio"/> | <input type="radio"/> |

**60) Hvordan passer disse utsagnene for deg?**

|                                                                                                                  | Helt<br>uendig        |                       |                       | Helt<br>endig         |                       |
|------------------------------------------------------------------------------------------------------------------|-----------------------|-----------------------|-----------------------|-----------------------|-----------------------|
|                                                                                                                  | 1                     | 2                     | 3                     | 4                     | 5                     |
| Det er morsommere å drive med trening eller fysisk aktivitet enn å gjøre andre ting...                           | <input type="radio"/> | <input type="radio"/> | <input type="radio"/> | <input type="radio"/> | <input type="radio"/> |
| Jeg skulle ønske jeg kunne drive mer med trening eller fysisk aktivitet enn det jeg har anledning til å gjøre... | <input type="radio"/> | <input type="radio"/> | <input type="radio"/> | <input type="radio"/> | <input type="radio"/> |
| Jeg føler at jeg er bedre enn de fleste på min alder i idrett/fysisk aktivitet...                                | <input type="radio"/> | <input type="radio"/> | <input type="radio"/> | <input type="radio"/> | <input type="radio"/> |
| Jeg føler at jeg lett kan holde følge med de andre på min alder når vi driver med idrett/fysisk aktivitet...     | <input type="radio"/> | <input type="radio"/> | <input type="radio"/> | <input type="radio"/> | <input type="radio"/> |





## 61) Hvordan passer disse utsagnene for deg?

|                                                                                                             | Helt<br>uenig         |                       |                       | Helt<br>enig          |                       |
|-------------------------------------------------------------------------------------------------------------|-----------------------|-----------------------|-----------------------|-----------------------|-----------------------|
|                                                                                                             | 1                     | 2                     | 3                     | 4                     | 5                     |
| Jeg liker ikke å trene mens noen står å ser på...                                                           | <input type="radio"/> | <input type="radio"/> | <input type="radio"/> | <input type="radio"/> | <input type="radio"/> |
| Tilgang til egen garderobe hadde gjort det lettere å trene...                                               | <input type="radio"/> | <input type="radio"/> | <input type="radio"/> | <input type="radio"/> | <input type="radio"/> |
| Jeg blir ubehagelig andpusten, svett eller får vondt i kroppen ved trening...                               | <input type="radio"/> | <input type="radio"/> | <input type="radio"/> | <input type="radio"/> | <input type="radio"/> |
| Gymtimene er organisert slik at jeg ikke henger med...                                                      | <input type="radio"/> | <input type="radio"/> | <input type="radio"/> | <input type="radio"/> | <input type="radio"/> |
| Jeg har ingen å trene sammen med...                                                                         | <input type="radio"/> | <input type="radio"/> | <input type="radio"/> | <input type="radio"/> | <input type="radio"/> |
| Jeg mangler utstyr for å drive med den aktiviteten jeg har lyst til...                                      | <input type="radio"/> | <input type="radio"/> | <input type="radio"/> | <input type="radio"/> | <input type="radio"/> |
| Jeg har for mange andre oppgaver som gjør at jeg ikke får tid til å trene (f.eks lekser, hjemmeoppgaver)... | <input type="radio"/> | <input type="radio"/> | <input type="radio"/> | <input type="radio"/> | <input type="radio"/> |
| Det mangler egnede haller eller gode uteområder for å drive fysisk aktivitet der jeg bor...                 | <input type="radio"/> | <input type="radio"/> | <input type="radio"/> | <input type="radio"/> | <input type="radio"/> |



## MATVANER OG KOSTHOLD

**62) Hvor ofte pleier du å spise følgende i løpet av en uke?**

|         | 4-6<br>Hver dager<br>dag i uka | 1-3<br>dager<br>i uka | Sjelden<br>eller<br>aldri |
|---------|--------------------------------|-----------------------|---------------------------|
| Frokost | <input type="radio"/>          | <input type="radio"/> | <input type="radio"/>     |
| Middag  | <input type="radio"/>          | <input type="radio"/> | <input type="radio"/>     |

**63) Hvor ofte spiser du matpakke hjemmefra på skole eller arbeid?**

- Hver dag
- 3-4 ganger per uke
- 1-2 ganger per uke
- Sjelden eller aldri

**64) Hvor ofte spiser du vanligvis disse matvarene?**

|                                                           | Sjelden/<br>aldri     | 1-3<br>ganger<br>per<br>måned | 1-3<br>ganger<br>per<br>uke | 4-6<br>ganger<br>per<br>uke | Hver<br>dag           |
|-----------------------------------------------------------|-----------------------|-------------------------------|-----------------------------|-----------------------------|-----------------------|
| Ost (alle typer)                                          | <input type="radio"/> | <input type="radio"/>         | <input type="radio"/>       | <input type="radio"/>       | <input type="radio"/> |
| Fet fisk (f.eks. laks, ørret, makrell, sild)              | <input type="radio"/> | <input type="radio"/>         | <input type="radio"/>       | <input type="radio"/>       | <input type="radio"/> |
| Mager fisk (f.eks. torsk, sei, hyse)                      | <input type="radio"/> | <input type="radio"/>         | <input type="radio"/>       | <input type="radio"/>       | <input type="radio"/> |
| Pizza, hamburger eller pølser                             | <input type="radio"/> | <input type="radio"/>         | <input type="radio"/>       | <input type="radio"/>       | <input type="radio"/> |
| Hermetisert mat (fra metallbokser)                        | <input type="radio"/> | <input type="radio"/>         | <input type="radio"/>       | <input type="radio"/>       | <input type="radio"/> |
| Godteri (f.eks. sjokolade, drops)                         | <input type="radio"/> | <input type="radio"/>         | <input type="radio"/>       | <input type="radio"/>       | <input type="radio"/> |
| Snacks og søtsaker (f.eks. potetgull, kake, kjeks, bolle) | <input type="radio"/> | <input type="radio"/>         | <input type="radio"/>       | <input type="radio"/>       | <input type="radio"/> |
| Sukkerfri tyggegummi                                      | <input type="radio"/> | <input type="radio"/>         | <input type="radio"/>       | <input type="radio"/>       | <input type="radio"/> |



### 65) Hvor ofte spiser du vanligvis

|            |                       | 1-3                   | 1-3                   | 4-6                   | 1-2                   | 3-4                   | 5 eller<br>flere      |
|------------|-----------------------|-----------------------|-----------------------|-----------------------|-----------------------|-----------------------|-----------------------|
|            | Sjelden/<br>aldri     | ganger<br>per<br>mnd  | ganger<br>per<br>uke  | ganger<br>per<br>uke  | ganger<br>per<br>dag  | ganger<br>per<br>dag  | ganger<br>per<br>dag  |
| Frukt      | <input type="radio"/> | <input type="radio"/> | <input type="radio"/> | <input type="radio"/> | <input type="radio"/> | <input type="radio"/> | <input type="radio"/> |
| Grønnsaker | <input type="radio"/> | <input type="radio"/> | <input type="radio"/> | <input type="radio"/> | <input type="radio"/> | <input type="radio"/> | <input type="radio"/> |



### 66) Hvor mye drikker du vanligvis av følgende?

|                                                       | Sjelden/<br>aldri     | 1-6<br>glass<br>per<br>uke | 1<br>glass<br>per<br>dag | 2-3<br>glass<br>per<br>dag | 4<br>glass<br>eller<br>mer<br>per<br>dag |
|-------------------------------------------------------|-----------------------|----------------------------|--------------------------|----------------------------|------------------------------------------|
| Helmelk, kefir, yoghurt                               | <input type="radio"/> | <input type="radio"/>      | <input type="radio"/>    | <input type="radio"/>      | <input type="radio"/>                    |
| Lettmelk, cultura, lettyoghurt                        | <input type="radio"/> | <input type="radio"/>      | <input type="radio"/>    | <input type="radio"/>      | <input type="radio"/>                    |
| Skummet melk (sur/søt)                                | <input type="radio"/> | <input type="radio"/>      | <input type="radio"/>    | <input type="radio"/>      | <input type="radio"/>                    |
| Ekstra lett melk                                      | <input type="radio"/> | <input type="radio"/>      | <input type="radio"/>    | <input type="radio"/>      | <input type="radio"/>                    |
| Juice                                                 | <input type="radio"/> | <input type="radio"/>      | <input type="radio"/>    | <input type="radio"/>      | <input type="radio"/>                    |
| Saft med sukker                                       | <input type="radio"/> | <input type="radio"/>      | <input type="radio"/>    | <input type="radio"/>      | <input type="radio"/>                    |
| Lettsaft, kunstig søtet                               | <input type="radio"/> | <input type="radio"/>      | <input type="radio"/>    | <input type="radio"/>      | <input type="radio"/>                    |
| Brus med sukker (1/2 liters flaske = 2 glass)         | <input type="radio"/> | <input type="radio"/>      | <input type="radio"/>    | <input type="radio"/>      | <input type="radio"/>                    |
| Lettbrus, kunstig søtet (1/2 liters flaske = 2 glass) | <input type="radio"/> | <input type="radio"/>      | <input type="radio"/>    | <input type="radio"/>      | <input type="radio"/>                    |
| Vann                                                  | <input type="radio"/> | <input type="radio"/>      | <input type="radio"/>    | <input type="radio"/>      | <input type="radio"/>                    |

### 67) Bruker du følgende kosttilskudd?

|                                     | Av<br>Ja,<br>daglig   | og<br>til             | Nei                   |
|-------------------------------------|-----------------------|-----------------------|-----------------------|
| Tran, trankapsler, fiskeoljekapsler | <input type="radio"/> | <input type="radio"/> | <input type="radio"/> |
| Vitamin- og/eller mineraltilskudd   | <input type="radio"/> | <input type="radio"/> | <input type="radio"/> |



## **SØVN OG SØNVANER**

**68) Når pleier du å legge deg for å sove på ukedagene?**

- 18.00 eller tidligere
- 18.30
- 19.00
- 19.30
- 20.00
- 20.30
- 21.00
- 21.30
- 22.00
- 22.30
- 23.00
- 23.30
- 00.00
- 00.30
- 01.00
- 01.30
- 02.00 eller senere

**69) Når pleier du å legge deg for å sove i helgen?**

- 19.00 eller tidligere
- 19.30
- 20.00

- 20.30
- 21.00
- 21.30
- 22.00
- 22.30
- 23.00
- 23.30
- 00.00
- 00.30
- 01.00
- 01.30
- 02.00
- 02.30
- 03.00
- 03.30
- 04.00 eller senere

**70) Hvor lenge pleier du å ligge våken før du får sove på ukedagene?**

- 1/2 time eller mindre
- 1 time
- 1 1/2 timer
- 2 timer
- 2 1/2 timer
- 3 timer eller mer

**71) Hvor lenge pleier du å ligge våken før du får sove i helgen?**

- 1/2 time eller mindre
- 1 time
- 1 1/2 timer
- 2 timer
- 2 1/2 timer
- 3 timer eller mer

**72) Når pleier du å våkne på ukedagene (endelig oppvåkning)?**

- 05.00 eller tidligere
- 05.30
- 06.00
- 06.30
- 07.00
- 07.30
- 08.00
- 08.30
- 09.00
- 09.30
- 10.00 eller senere

**73) Når pleier du å våkne i helgen (endelig oppvåkning)?**

- 05.00 eller tidligere
- 05.30
- 06.00

- 06.30
- 07.00
- 07.30
- 08.00
- 08.30
- 09.00
- 09.30
- 10.00
- 10.30
- 11.00
- 11.30
- 12.00
- 12.30
- 13.00
- 13.30
- 14.00 eller senere



**74) Hvor mange timer sover du vanligvis pr. natt?**

- 4 timer eller mindre
- 4 1/2 timer
- 5 timer
- 5 1/2 timer
- 6 timer
- 6 1/2 timer
- 7 timer
- 7 1/2 timer
- 8 timer
- 8 1/2 timer
- 9 timer
- 9 1/2 timer
- 10 timer
- 10 1/2 timer
- 11 timer
- 11 1/2 timer
- 12 timer eller mer

**75) Hvor mange timer søvn trenger du pr. natt for å føle deg uthvilt?**

- 4 timer eller mindre
- 4 1/2 timer
- 5 timer
- 5 1/2 timer

- 6 timer
- 6 1/2 timer
- 7 timer
- 7 1/2 timer
- 8 timer
- 8 1/2 timer
- 9 timer
- 9 1/2 timer
- 10 timer
- 10 1/2 timer
- 11 timer
- 11 1/2 timer
- 12 timer eller mer

**76) Synes du at du får tilstrekkelig med søvn?**

- Ja, absolutt tilstrekkelig
- Ja, stort sett tilstrekkelig
- Nei, noe utilstrekkelig
- Nei, klart utilstrekkelig
- Nei, langt fra tilstrekkelig



**77) I løpet av den siste måneden, hvor mange dager pr. uke har du**

|                                                                                  | 0                     | 1                     | 2                     | 3                     | 4                     | 5                     | 6                     | 7                     |
|----------------------------------------------------------------------------------|-----------------------|-----------------------|-----------------------|-----------------------|-----------------------|-----------------------|-----------------------|-----------------------|
|                                                                                  | dager                 | dag                   | dager                 | dager                 | dager                 | dager                 | dager                 | dager                 |
| brukt mer enn 30 minutter for å sovne etter at lysene ble slukket?               | <input type="radio"/> | <input type="radio"/> | <input type="radio"/> | <input type="radio"/> | <input type="radio"/> | <input type="radio"/> | <input type="radio"/> | <input type="radio"/> |
| vært våken mer enn 30 minutter innimellom søvnen?                                | <input type="radio"/> | <input type="radio"/> | <input type="radio"/> | <input type="radio"/> | <input type="radio"/> | <input type="radio"/> | <input type="radio"/> | <input type="radio"/> |
| våknet mer enn 30 minutter tidligere enn du ønsket å gjøre uten å få sove igjen? | <input type="radio"/> | <input type="radio"/> | <input type="radio"/> | <input type="radio"/> | <input type="radio"/> | <input type="radio"/> | <input type="radio"/> | <input type="radio"/> |
| følt deg for lite uthvilt etter å ha sovet?                                      | <input type="radio"/> | <input type="radio"/> | <input type="radio"/> | <input type="radio"/> | <input type="radio"/> | <input type="radio"/> | <input type="radio"/> | <input type="radio"/> |
| vært så søvnig/trett at det har gått ut over skole/jobb eller privatlivet?       | <input type="radio"/> | <input type="radio"/> | <input type="radio"/> | <input type="radio"/> | <input type="radio"/> | <input type="radio"/> | <input type="radio"/> | <input type="radio"/> |
| vært misfornøyd med søvnen din?                                                  | <input type="radio"/> | <input type="radio"/> | <input type="radio"/> | <input type="radio"/> | <input type="radio"/> | <input type="radio"/> | <input type="radio"/> | <input type="radio"/> |
| hatt vansker med å sovne før kl 02:00?                                           | <input type="radio"/> | <input type="radio"/> | <input type="radio"/> | <input type="radio"/> | <input type="radio"/> | <input type="radio"/> | <input type="radio"/> | <input type="radio"/> |
| hatt vansker med å våkne om morgenen?                                            | <input type="radio"/> | <input type="radio"/> | <input type="radio"/> | <input type="radio"/> | <input type="radio"/> | <input type="radio"/> | <input type="radio"/> | <input type="radio"/> |
| har du forsovet deg til skolen, arbeid eller avtaler?                            | <input type="radio"/> | <input type="radio"/> | <input type="radio"/> | <input type="radio"/> | <input type="radio"/> | <input type="radio"/> | <input type="radio"/> | <input type="radio"/> |



## Følsomhet for støy

**78) Hvor enig eller uenig er du i utsagnene? Sett kryss for det svaralternativet som passer best for hvert utsagn**

|                                                                                            | Helt<br>uenig         | Ganske<br>uenig       | Litt<br>uenig         | Litt<br>enig          | Ganske<br>enig        | Helt<br>enig          |
|--------------------------------------------------------------------------------------------|-----------------------|-----------------------|-----------------------|-----------------------|-----------------------|-----------------------|
| Jeg vekkes lett av støy                                                                    | <input type="radio"/> | <input type="radio"/> | <input type="radio"/> | <input type="radio"/> | <input type="radio"/> | <input type="radio"/> |
| Jeg venner meg til de fleste lyder uten store problemer                                    | <input type="radio"/> | <input type="radio"/> | <input type="radio"/> | <input type="radio"/> | <input type="radio"/> | <input type="radio"/> |
| Det er vanskelig for meg å slappe av på et sted med mye støy                               | <input type="radio"/> | <input type="radio"/> | <input type="radio"/> | <input type="radio"/> | <input type="radio"/> | <input type="radio"/> |
| Jeg er flink til å konsentrere meg uansett hva som skjer rundt meg                         | <input type="radio"/> | <input type="radio"/> | <input type="radio"/> | <input type="radio"/> | <input type="radio"/> | <input type="radio"/> |
| Jeg blir sint på folk som lager støy som hindrer meg i å sovne eller å få gjort jobben min | <input type="radio"/> | <input type="radio"/> | <input type="radio"/> | <input type="radio"/> | <input type="radio"/> | <input type="radio"/> |
| Jeg er følsom for støy                                                                     | <input type="radio"/> | <input type="radio"/> | <input type="radio"/> | <input type="radio"/> | <input type="radio"/> | <input type="radio"/> |



## **SOLING**

**79) Hva skjer med huden din hvis du soler deg om sommeren?**

- Alltid rød, aldri brun
- Nesten alltid rød, av og til brun
- Nesten alltid brun, av og til rød
- Alltid brun, aldri rød

**80) Har du vært i Syden-/solingsferie de siste 2 måneder?**

- Ja
- Nei

**81) Har du tatt solarium i løpet av de siste 4 ukene?**

- Nei
- Ja, en gang
- Ja, flere ganger



## **SMERTER**

**82) Har du langvarige eller stadig tilbakevendende smerter som har vart i 3 måneder eller mer?**

- Ja     Nei



## Denne informasjonen vises kun i forhåndsvisningen

Følgende betingelser må være oppfylt for at spørsmålet skal vises for respondenten:

Dersom spørsmålet "Har du langvarige eller stadig tilbakevendende smerter som har vart i 3 måneder eller mer?" inneholder noen av disse alternativene

- "Ja"

### 83) Hvor ofte har du vanligvis disse smertene?

- Hele tiden, uten opphør
- Hver dag, men ikke hele tiden
- Hver uke, men ikke hver dag
- Sjeldnere enn hver uke

## Denne informasjonen vises kun i forhåndsvisningen

Følgende betingelser må være oppfylt for at spørsmålet skal vises for respondenten:

Dersom spørsmålet "Har du langvarige eller stadig tilbakevendende smerter som har vart i 3 måneder eller mer?" inneholder noen av disse alternativene

- "Ja"

### 84) Hvor lenge har du hatt disse smertene? (Dersom du har flere typer smerte, svar for den som har vart lengst)

- 3 - 6 måneder
- 6 - 12 måneder
- 1-2 år
- 3-6 år
- Mer enn 6 år



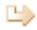

## Denne informasjonen vises kun i forhåndsvisningen

Følgende betingelser må være oppfylt for at spørsmålet skal vises for respondenten:

Dersom spørsmålet "Har du langvarige eller stadig tilbakevendende smerter som har vart i 3 måneder eller mer?" inneholder noen av disse alternativene

- "Ja"

Hvor er det vondt?

(Kryss av på alle aktuelle steder)

|              | Venstre side             | Høyre side               |
|--------------|--------------------------|--------------------------|
| Skulder      | <input type="checkbox"/> | <input type="checkbox"/> |
| Arm/albue    | <input type="checkbox"/> | <input type="checkbox"/> |
| Hånd         | <input type="checkbox"/> | <input type="checkbox"/> |
| Hofte        | <input type="checkbox"/> | <input type="checkbox"/> |
| Lår/kne/legg | <input type="checkbox"/> | <input type="checkbox"/> |
| Ankel/fot    | <input type="checkbox"/> | <input type="checkbox"/> |

## Denne informasjonen vises kun i forhåndsvisningen

Følgende betingelser må være oppfylt for at spørsmålet skal vises for respondenten:

Dersom spørsmålet "Har du langvarige eller stadig tilbakevendende smerter som har vart i 3 måneder eller mer?" inneholder noen av disse alternativene

- "Ja"

- Hode/ansikt
- Kjeve/kjeveledd
- Nakke
- Øvre del av ryggen
- Korsryggen
- Bryst
- Mage
- Underliv/kjønnsorganer



## Denne informasjonen vises kun i forhåndsvisningen

Følgende betingelser må være oppfylt for at spørsmålet skal vises for respondenten:

Dersom spørsmålet "Har du langvarige eller stadig tilbakevendende smerter som har vart i 3 måneder eller mer?" inneholder noen av disse alternativene

- "Ja"

### 87) Hva mener du er årsaken til smertene? (flere svar mulig)

- PC-bruk, dataspill og lignende
- Idrettsskade
- Ulykke/skade
- Kirurgisk inngrep/operasjon
- Migrene/hodepine
- Medfødt sykdom
- Tannproblemer
- Whiplash
- Prolaps (skiveutglidning i ryggen)
- Annet ryggproblem
- Nerveskade
- Mage- eller tarmsykdom



## Denne informasjonen vises kun i forhåndsvisningen

Følgende betingelser må være oppfylt for at spørsmålet skal vises for respondenten:

Dersom spørsmålet “Har du langvarige eller stadig tilbakevendende smerter som har vart i 3 måneder eller mer?” inneholder noen av disse alternativene

- “Ja”

Hvis du har langvarige smerter flere steder i kroppen, gjelder de 4 neste spørsmålene smerten som plager deg mest.

Dersom du har flere typer smerte, svar den som plager deg mest.

### 88) Hvor sterke vil du si at smertene vanligvis er?

- 0 Ingen smerte
- 1
- 2
- 3
- 4
- 5
- 6
- 7
- 8
- 9
- 10 Verst tenkelige smerte

## Denne informasjonen vises kun i forhåndsvisningen

Følgende betingelser må være oppfylt for at spørsmålet skal vises for respondenten:

Dersom spørsmålet “Har du langvarige eller stadig tilbakevendende smerter som har vart i 3 måneder eller mer?” inneholder noen av disse alternativene

- “Ja”

### 89) Hvor sterke er smertene når de er på sitt sterkeste?

- 0 Ingen smerte
- 1
- 2
- 3
- 4
- 5
- 6
- 7
- 8
- 9
- 10 Verst tenkelige smerte

## Denne informasjonen vises kun i forhåndsvisningen

Følgende betingelser må være oppfylt for at spørsmålet skal vises for respondenten:

Dersom spørsmålet “Har du langvarige eller stadig tilbakevendende smerter som har vart i 3 måneder eller mer?” inneholder noen av disse alternativene

- “Ja”

**90) I hvor stor grad påvirker smertene søvnen din?**

- 0 Ingen påvirkning
- 1
- 2
- 3
- 4
- 5
- 6
- 7
- 8
- 9
- 10 Umulig å få sove på grunn av smertene

**Denne informasjonen vises kun i forhåndsvisningen**

Følgende betingelser må være oppfylt for at spørsmålet skal vises for respondenten:

Dersom spørsmålet “Har du langvarige eller stadig tilbakevendende smerter som har vart i 3 måneder eller mer?” inneholder noen av disse alternativene

- “Ja”

**91) I hvor stor grad hindrer smertene deg i å utføre vanlige aktiviteter hjemme og på skolen?**

- 0 Påvirker ikke vanlige aktiviteter
- 1
- 2
- 3
- 4
- 5
- 6
- 7
- 8
- 9
- 10 Kan ikke gjøre noe på grunn av smertene



**92) Får du smerter i muskler og ledd når du har feber?**

- Ja     Nei





## Denne informasjonen vises kun i forhåndsvisningen

Følgende betingelser må være oppfylt for at spørsmålet skal vises for respondenten:

Dersom spørsmålet "Får du smerter i muskler og ledd når du har feber?" inneholder noen av disse alternativene

- "Ja"

### 93) Hvor sterke er febersmertene vanligvis?

- 0 Ingen smerte
- 1
- 2
- 3
- 4
- 5
- 6
- 7
- 8
- 9
- 10 Verst tenkelige smerte



## **MAGE- OG TARMPROBLEMER**

**94) I løpet av de siste 2 månedene: Hvor ofte har du hatt smerte eller ubehag i magen?**

- Aldri
- 1-3 ganger i måneden
- En gang i uka
- Flere ganger i uka
- Hver dag



## Denne informasjonen vises kun i forhåndsvisningen

Følgende betingelser må være oppfylt for at spørsmålet skal vises for respondenten:

Dersom spørsmålet "I løpet av de siste 2 månedene: Hvor ofte har du hatt smerte eller ubehag i magen?" inneholder noen av disse alternativene

- "Hver dag"
- "Flere ganger i uka"
- "En gang i uka"
- "1-3 ganger i måneden"

### 95) Hvor lenge har du vært plaget av smerte eller ubehag i magen?

- Mindre enn 1 måned
- 2 måneder
- 3 måneder
- 4-11 måneder
- Ett år eller mer



## Denne informasjonen vises kun i forhåndsvisningen

Følgende betingelser må være oppfylt for at spørsmålet skal vises for respondenten:

Dersom spørsmålet "Hvor lenge har du vært plaget av smerte eller ubehag i magen?" inneholder noen av disse alternativene

- "Ett år eller mer"
- "4-11 måneder"
- "3 måneder"
- "2 måneder"

**96) I hvilken del av magen er det du har hatt smerte eller ubehag? (kryss av for alt som passer)**

- Over navlen
- Rundt navlen
- Nedenfor navlen

## Denne informasjonen vises kun i forhåndsvisningen

Følgende betingelser må være oppfylt for at spørsmålet skal vises for respondenten:

Dersom spørsmålet "Hvor lenge har du vært plaget av smerte eller ubehag i magen?" inneholder noen av disse alternativene

- "Ett år eller mer"
- "4-11 måneder"
- "3 måneder"
- "2 måneder"

**97) Når du har smerter eller ubehag i magen, hvor lenge varer det vanligvis?**

- Mindre enn 1 time
- 1-2 timer
- 3-4 timer
- Mesteparten av dagen
- Hele døgnet

**Denne informasjonen vises kun i forhåndsvisningen**

Følgende betingelser må være oppfylt for at spørsmålet skal vises for respondenten:

Dersom spørsmålet "Hvor lenge har du vært plaget av smerte eller ubehag i magen?" inneholder noen av disse alternativene

- "Ett år eller mer"
- "4-11 måneder"
- "3 måneder"
- "2 måneder"

**98) Når du har smerte eller ubehag i magen, hvor sterke smerter har du vanligvis?**

- 0 Ingen smerte
- 1
- 2
- 3
- 4
- 5
- 6

- 7
- 8
- 9
- 10 Verst tenkelige smerte



## Denne informasjonen vises kun i forhåndsvisningen

Følgende betingelser må være oppfylt for at spørsmålet skal vises for respondenten:

Dersom spørsmålet "Hvor lenge har du vært plaget av smerte eller ubehag i magen?" inneholder noen av disse alternativene

- "Ett år eller mer"
- "4-11 måneder"
- "3 måneder"
- "2 måneder"

**99) Når du har smerter eller ubehag i magen, hvor ofte blir det bedre etter at du har hatt avføring?**

- Sjelden eller aldri
- En del ganger
- For det meste/hver gang

## Denne informasjonen vises kun i forhåndsvisningen

Følgende betingelser må være oppfylt for at spørsmålet skal vises for respondenten:

Dersom spørsmålet "Hvor lenge har du vært plaget av smerte eller ubehag i magen?" inneholder noen av disse alternativene

- "Ett år eller mer"
- "4-11 måneder"
- "3 måneder"
- "2 måneder"

**100) Når du har smerter eller ubehag i magen, hvor ofte skjer det i forbindelse med at du..**

|                                                     | Sjelden<br>eller<br>aldri | En del<br>ganger      | For<br>det<br>meste   |
|-----------------------------------------------------|---------------------------|-----------------------|-----------------------|
| har fastere eller mer klumpete avføring enn vanlig? | <input type="radio"/>     | <input type="radio"/> | <input type="radio"/> |
| har løsere eller mer vannaktig avføring enn vanlig? | <input type="radio"/>     | <input type="radio"/> | <input type="radio"/> |
| hadde avføring oftere enn vanlig?                   | <input type="radio"/>     | <input type="radio"/> | <input type="radio"/> |
| hadde avføring sjeldnere enn vanlig?                | <input type="radio"/>     | <input type="radio"/> | <input type="radio"/> |



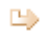

## **HODEPINE**

**101) Har du vært plaget av hodepine det siste året?**

- Ja     Nei



## Denne informasjonen vises kun i forhåndsvisningen

Følgende betingelser må være oppfylt for at spørsmålet skal vises for respondenten:

Dersom spørsmålet "Har du vært plaget av hodepine det siste året?" inneholder noen av disse alternativene

- "Ja"

### 102) Hva slags hodepine er du plaget av? (Du kan sette flere kryss)

- Migrene     Annen hodepine     Vet ikke

## Denne informasjonen vises kun i forhåndsvisningen

Følgende betingelser må være oppfylt for at spørsmålet skal vises for respondenten:

Dersom spørsmålet "Har du vært plaget av hodepine det siste året?" inneholder noen av disse alternativene

- "Ja"

### 103) Omtrent hvor mange dager per måned har du hodepine?

- Mindre enn 1 dag
- 1-6 dager
- 7-14 dager
- Mer enn 14 dager

## Denne informasjonen vises kun i forhåndsvisningen

Følgende betingelser må være oppfylt for at spørsmålet skal vises for respondenten:

Dersom spørsmålet "Har du vært plaget av hodepine det siste året?" inneholder noen av disse alternativene

- "Ja"

### 104) Er hodepinen vanligvis:

|                                      | Ja                    | Nei                   |
|--------------------------------------|-----------------------|-----------------------|
| Bankende/dunkende smerte             | <input type="radio"/> | <input type="radio"/> |
| Pressende smerte                     | <input type="radio"/> | <input type="radio"/> |
| Ensidig smerte (høyre eller venstre) | <input type="radio"/> | <input type="radio"/> |



## Denne informasjonen vises kun i forhåndsvisningen

Følgende betingelser må være oppfylt for at spørsmålet skal vises for respondenten:

Dersom spørsmålet "Har du vært plaget av hodepine det siste året?" inneholder noen av disse alternativene

- "Ja"

### 105) Hvor lenge varer hodepinen vanligvis?

- Mindre enn 4 timer
- 4 timer - 1 døgn
- 1-3 døgn
- Mer enn 3 døgn

## Denne informasjonen vises kun i forhåndsvisningen

Følgende betingelser må være oppfylt for at spørsmålet skal vises for respondenten:

Dersom spørsmålet "Har du vært plaget av hodepine det siste året?" inneholder noen av disse alternativene

- "Ja"

### 106) Før eller under hodepinen, kan du da ha forbigående:

Ja Nei

Synsforstyrrelse? (takkede linjer, flimring, tåkesyn, lysglimt)

Ja Nei

Nummenhet i halve ansiktet eller i hånden?

 

Forverring ved moderat fysisk aktivitet?

 

Kvalme og/eller oppkast?



Nedenfor er det fire spørsmål om hvordan du opplever det er å gå til tannlege. Les hvert spørsmål og velg det svaralternativet som du synes passer best for deg.

**107) Dersom du skulle gå til tannlegen i morgen, hva ville du føle?**

- Jeg ville se frem til det som en ganske hyggelig opplevelse
- Det ville være det samme for meg, ikke bety noe
- Det ville gjøre meg litt urolig
- Jeg ville bli redd for at det skulle bli ubehagelig og vondt
- Jeg ville bli svært redd med tanke på hva tannlegen kanskje skulle gjøre

**108) Når du venter på tannlegens venteværelse, hvordan føler du deg da?**

- Avslappet
- Litt urolig
- Anspent, nervøs
- Redd, engstelig
- Så redd at jeg av og til begynner å svette eller nesten føler meg syk

**109) Når du sitter i tannlegestolen og venter på at tannlegen skal begynne behandlingen, hvordan føler du deg da?**

- Avslappet
- Litt urolig
- Anspent, nervøs
- Redd, engstelig
- Så redd at jeg av og til begynner å svette eller nesten føler meg syk

**110) Tenk at du sitter i tannlegestolen og skal få tennene rensset og pusset. Mens du sitter og venter på at tannlege skal finne frem instrumentene som brukes til å skrape og pusse med, hvordan føler du deg da?**

- Avslappet
- Litt urolig
- Anspent, nervøs
- Redd, engstelig
- Så redd at jeg av og til begynner å svette eller nesten føler meg syk



## **HØRSEL**

**111) Har du et hørseltap som du vet om?**

- Nei
- Ja
- Kanskje





## Denne informasjonen vises kun i forhåndsvisningen

Følgende betingelser må være oppfylt for at spørsmålet skal vises for respondenten:

Dersom spørsmålet "Har du et hørseltap som du vet om?" inneholder noen av disse alternativene

- "Ja"

**112) Er hørseltapet bekreftet av lege eller annet helsepersonell?**

- Nei     Ja

## Denne informasjonen vises kun i forhåndsvisningen

Følgende betingelser må være oppfylt for at spørsmålet skal vises for respondenten:

Dersom spørsmålet "Har du et hørseltap som du vet om?" inneholder noen av disse alternativene

- "Ja"

**113) Bruker du høreapparat?**

- Nei     Ja

**114) Har du øresus?**

- Aldri     Sjelden     Ofte



## Denne informasjonen vises kun i forhåndsvisningen

Følgende betingelser må være oppfylt for at spørsmålet skal vises for respondenten:

Dersom spørsmålet "Har du øresus?" inneholder noen av disse alternativene

- "Ofte"
- "Sjelden"

### 115) Hvor ofte har du øresus?

- Hele tiden, uten opphør
- Hver dag, men ikke hele tiden
- Hver uke, men ikke hver dag
- Sjeldnere enn hver uke

## Denne informasjonen vises kun i forhåndsvisningen

Følgende betingelser må være oppfylt for at spørsmålet skal vises for respondenten:

Dersom spørsmålet "Har du øresus?" inneholder noen av disse alternativene

- "Ofte"
- "Sjelden"

### 116) Hvor lenge varer vanligvis periodene med øresus?

- Mindre enn 10 minutter     10 minutter - 1 time
- Mer enn 1 time

## Denne informasjonen vises kun i forhåndsvisningen

Følgende betingelser må være oppfylt for at spørsmålet skal vises for respondenten:

Dersom spørsmålet "Har du øresus?" inneholder noen av disse alternativene

- "Ofte"
- "Sjelden"

### 117) Når får du vanligvis øresus?

- Etter sterke lyder     Når det er stille     Vet aldri når



## Denne informasjonen vises kun i forhåndsvisningen

Følgende betingelser må være oppfylt for at spørsmålet skal vises for respondenten:

Dersom spørsmålet "Har du øresus?" inneholder noen av disse alternativene

- "Ofte"
- "Sjelden"

**118) Noen bryr seg ikke om lyden, for andre oppleves det svært plagsomt å ha øresus. Angi hvor plaget du er av øresusen.**

- 0 Ingen plager
- 1
- 2
- 3
- 4
- 5
- 6
- 7
- 8
- 9
- 10 Verst tenkelige plager

Denne informasjonen vises kun i forhåndsvisningen

Følgende betingelser må være oppfylt for at spørsmålet skal vises for respondenten:

Dersom spørsmålet “Har du øresus?” inneholder noen av disse alternativene

- “Ofte”
- “Sjelden”

**119) På hvilket øre har du vanligvis øresus?**

- Bare høyre
- Bare venstre
- Begge, men mest høyre
- Begge, men mest venstre
- Like mye på begge



## Denne informasjonen vises kun i forhåndsvisningen

Følgende betingelser må være oppfylt for at spørsmålet skal vises for respondenten:

Dersom spørsmålet "Har du øresus?" inneholder noen av disse alternativene

- "Sjelden"

### 120) Omtrent hvor gammel var du når du begynte å ha øresus?

- 1 år
- 2 år
- 3 år
- 4 år
- 5 år
- 6 år
- 7 år
- 8 år
- 9 år
- 10 år
- 11 år
- 12 år
- 13 år
- 14 år
- 15 år

- 16 år
- 17 år
- 18 år
- 19 år
- 20 år eller mer





## Denne informasjonen vises kun i forhåndsvisningen

Følgende betingelser må være oppfylt for at spørsmålet skal vises for respondenten:

Dersom spørsmålet "Har du øresus?" inneholder noen av disse alternativene

- "Ofte"

### 121) Omtrent hvor gammel var du når du begynte å ha øresus ofte?

- 1 år
- 2 år
- 3 år
- 4 år
- 5 år
- 6 år
- 7 år
- 8 år
- 9 år
- 10 år
- 11 år
- 12 år
- 13 år
- 14 år
- 15 år

- 16 år
- 17 år
- 18 år
- 19 år
- 20 år eller mer

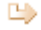

## **SYKEHUS OG INFEKSJONER**

**122) Har du vært innlagt som pasient på sykehus i løpet av de siste 12 månedene?**

- Ja     Nei

**123) Arbeider noen du bor sammen med i helsevesenet (sykehus, sykehjem, hjemmetjenesten, legekantor, helsestasjon)?**

- Ja     Nei



**124) Har du tidligere fått fjernet mandlene?**

- Ja     Nei     Vet ikke



## Denne informasjonen vises kun i forhåndsvisningen

Følgende betingelser må være oppfylt for at spørsmålet skal vises for respondenten:

Dersom spørsmålet "Har du tidligere fått fjernet mandlene?" inneholder noen av disse alternativene

- "Ja"

### 125) Jeg fikk fjernet mandlene fordi jeg hadde

- halsbetennelse som kom og gikk
- halsbetennelse og vondt i halsen og/eller dårlig ånde hele tiden
- store mandler og trang hals (dette kan gi svelgproblemer, snorking, pustestopp)
- både halsbetennelse og store mandler
- vet ikke



## Denne informasjonen vises kun i forhåndsvisningen

Følgende betingelser må være oppfylt for at spørsmålet skal vises for respondenten:

Dersom spørsmålet "Har du tidligere fått fjernet mandlene?" inneholder noen av disse alternativene

- "Nei"

### 126) Jeg har nå

- ingen plager fra halsen
- plaget med halsbetennelse som kommer og går
- konstante plager med halsbetennelse og vondt i halsen og/eller dårlig ånde
- store mandler og trang hals (dette kan gi svelgproblemer, snorking, pustestopp)
- plaget med både halsbetennelse og store mandler



## **TANNHELSE**

**127) Hvor ofte pusser du vanligvis tennene dine?**

- Sjeldnere enn 1 gang per uke
- 1 gang per uke
- 2-3 ganger per uke
- 4-6 ganger per uke
- 1 gang daglig
- 2 eller flere ganger daglig

**128) Hvor ofte bruker du noen av følgende hjelpemidler?**

|                   | Daglig                | Noen ganger i uka     | Noen ganger i måneden | Sjelden/aldri         |
|-------------------|-----------------------|-----------------------|-----------------------|-----------------------|
| Fluor tannkrem    | <input type="radio"/> | <input type="radio"/> | <input type="radio"/> | <input type="radio"/> |
| Tanntråd          | <input type="radio"/> | <input type="radio"/> | <input type="radio"/> | <input type="radio"/> |
| Tannstikker       | <input type="radio"/> | <input type="radio"/> | <input type="radio"/> | <input type="radio"/> |
| Fluortabletter    | <input type="radio"/> | <input type="radio"/> | <input type="radio"/> | <input type="radio"/> |
| Fluor skyllevæske | <input type="radio"/> | <input type="radio"/> | <input type="radio"/> | <input type="radio"/> |

**129) Hvor ofte kontrollerte foreldrene dine eller dine foresatte at du hadde pusset tennene dine da du var yngre?**

- Ofte
- Omtrent daglig
- Av og til
- Sjelden/aldri

**130) Hvordan vurderer du din egen tannhelse?**

- Meget god
- God
- Verken god eller dårlig
- Dårlig
- Meget dårlig



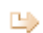**131) Hvorfor er fluor tilsatt i tannkrem?**

- Behagelig smak
- Gir god ånde
- Hindrer hull i tennene
- Gir hvite tenner

**132) Har du følt at tannlegen/tannpleieren ikke tar seg tid til å forklare eller svare på spørsmål?**

- Ja, ofte
- Ja, av og til
- Nei

**133) Er du fornøyd med tannstillingen din i fronten?**

- Veldig fornøyd
- Fornøyd
- Ganske fornøyd
- Verken fornøyd eller misfornøyd
- Ganske misfornøyd
- Misfornøyd
- Veldig misfornøyd

**134) Prøver du å unngå å smile på grunn av dine tenners utseende?**

- Aldri
- Veldig sjelden
- Sjelden
- Vanskelig å si
- Av og til
- Ganske ofte
- Ofte

**135) Ønsker du tannregulering for å få rettet opp tennene dine?**

- Ja, absolutt
- Ja
- Ja, kanskje
- Verken ja eller nei

- Tror ikke det
- Nei
- Absolutt ikke



**136) Har du hatt fast tannregulering/streng?**

- Ja     Nei

**137) Har du hatt avtagbar plate?**

- Ja     Nei



**138) Har du hatt tannregulering siden forrige gang du deltok i Fit Futures undersøkelsen?**

- Nei
- Ja
- Har ikke deltatt tidligere



## Denne informasjonen vises kun i forhåndsvisningen

Følgende betingelser må være oppfylt for at spørsmålet skal vises for respondenten:

Dersom spørsmålet "Har du hatt fast tannregulering/streng?" inneholder noen av disse alternativene

- "Ja"

**139) Hadde du allergiske reaksjoner i forbindelse med tannreguleringen?**

- Ja     Nei



**140) Hvor smertefullt, jevnt over, synes du det er å gå til tannlegen?**

- 0 Ingen smerte
- 1
- 2
- 3
- 4
- 5
- 6
- 7
- 8
- 9
- 10 Verst tenkelige smerte

**141) Har du latt være å møte opp til en tannlegetime pga frykt for tannbehandling?**

- Ja
- Nei



**Ta stilling til følgende påstander:**

**142) Tannpuss er svært viktig for meg når jeg skal**

|                                              | Helt<br>uenig         | Uenig                 | Enig                  | Helt<br>enig          |
|----------------------------------------------|-----------------------|-----------------------|-----------------------|-----------------------|
| ut med venner på ungdomsklubb, diskotek osv. | <input type="radio"/> | <input type="radio"/> | <input type="radio"/> | <input type="radio"/> |
| møte en kjæreste                             | <input type="radio"/> | <input type="radio"/> | <input type="radio"/> | <input type="radio"/> |
| på skolen                                    | <input type="radio"/> | <input type="radio"/> | <input type="radio"/> | <input type="radio"/> |
| møte min beste venn/venninne                 | <input type="radio"/> | <input type="radio"/> | <input type="radio"/> | <input type="radio"/> |
| delta i sport eller drive med hobbyer        | <input type="radio"/> | <input type="radio"/> | <input type="radio"/> | <input type="radio"/> |
| til tannlegen                                | <input type="radio"/> | <input type="radio"/> | <input type="radio"/> | <input type="radio"/> |

**143) Tannpuss er svært viktig for at jeg skal**

|                                     | Helt<br>uenig         | Uenig                 | Enig                  | Helt<br>enig          |
|-------------------------------------|-----------------------|-----------------------|-----------------------|-----------------------|
| føle meg frisk                      | <input type="radio"/> | <input type="radio"/> | <input type="radio"/> | <input type="radio"/> |
| unngå hull i tennene                | <input type="radio"/> | <input type="radio"/> | <input type="radio"/> | <input type="radio"/> |
| unngå at tennene får en stygg farge | <input type="radio"/> | <input type="radio"/> | <input type="radio"/> | <input type="radio"/> |
| få frisk pust                       | <input type="radio"/> | <input type="radio"/> | <input type="radio"/> | <input type="radio"/> |
| beholde sunt tannkjøtt              | <input type="radio"/> | <input type="radio"/> | <input type="radio"/> | <input type="radio"/> |
| få bedre utseende                   | <input type="radio"/> | <input type="radio"/> | <input type="radio"/> | <input type="radio"/> |



**144) jeg synes det ville være pinlig dersom det ble hull i**

|                            | Helt<br>uenig         | Uenig                 | Enig                  | Helt<br>enig          |
|----------------------------|-----------------------|-----------------------|-----------------------|-----------------------|
| mine egne tenner           | <input type="radio"/> | <input type="radio"/> | <input type="radio"/> | <input type="radio"/> |
| min mors tenner            | <input type="radio"/> | <input type="radio"/> | <input type="radio"/> | <input type="radio"/> |
| min fars tenner            | <input type="radio"/> | <input type="radio"/> | <input type="radio"/> | <input type="radio"/> |
| min venn/venninnens tenner | <input type="radio"/> | <input type="radio"/> | <input type="radio"/> | <input type="radio"/> |

**145) Tannpuss er svært viktig for at jeg skal få**

|                              | Helt<br>uenig         | Uenig                 | Enig                  | Helt<br>enig          |
|------------------------------|-----------------------|-----------------------|-----------------------|-----------------------|
| mine foreldres anerkjennelse | <input type="radio"/> | <input type="radio"/> | <input type="radio"/> | <input type="radio"/> |
| mine venners anerkjennelse   | <input type="radio"/> | <input type="radio"/> | <input type="radio"/> | <input type="radio"/> |



Ta stilling til følgende utsagn

**146) Hvor sikker er du på at du vil pusse tennene 2 ganger om dagen i 2 minutter med fluortannkrem i følgende situasjoner**

|                                                | Svært sikker          | Ganske sikker         | Noe usikker           | Ganske usikker        |
|------------------------------------------------|-----------------------|-----------------------|-----------------------|-----------------------|
| Når du er trøtt om kvelden                     | <input type="radio"/> | <input type="radio"/> | <input type="radio"/> | <input type="radio"/> |
| Når du har mye å gjøre (mye lekser, eksamener) | <input type="radio"/> | <input type="radio"/> | <input type="radio"/> | <input type="radio"/> |
| Når du har skoleferie                          | <input type="radio"/> | <input type="radio"/> | <input type="radio"/> | <input type="radio"/> |
| Når du er trøtt på morgenen                    | <input type="radio"/> | <input type="radio"/> | <input type="radio"/> | <input type="radio"/> |
| Når du føler deg syk (hodepine)                | <input type="radio"/> | <input type="radio"/> | <input type="radio"/> | <input type="radio"/> |

**147) Hvor sikker er du på at du er villig til avstå fra sukkerholdige drikker som brus, juice og saft til andre tider enn ved lunsj eller middag?**

- Svært sikker
- Ganske sikker
- Noe usikker
- Svært usikker

**148) Jeg har til hensikt å pusse tennene 2 ganger om dagen i minst 2 minutter med fluortannkrem hver dag**

- Helt enig
- Enig
- Uenig
- Helt uenig

**149) Hvor fornøyd er du med din tannhelse?**

- Svært misfornøyd
- Misfornøyd
- Verken eller
- Fornøyd
- Svært fornøyd



**150) Har du vært, eller er du, plaget med sur smak i munnen eller sure oppstøt?**

- Nei     Ja



## Denne informasjonen vises kun i forhåndsvisningen

Følgende betingelser må være oppfylt for at spørsmålet skal vises for respondenten:

Dersom spørsmålet "Har du vært, eller er du, plaget med sur smak i munnen eller sure oppstøt?" inneholder noen av disse alternativene

- "Ja"

**151) Hvor ofte har du vært, eller er du, plaget med sur smak i munnen eller sure oppstøt?**

- Daglig
- Noen ganger i uken
- Månedlig
- Sjelden eller aldri

## Denne informasjonen vises kun i forhåndsvisningen

Følgende betingelser må være oppfylt for at spørsmålet skal vises for respondenten:

Dersom spørsmålet "Har du vært, eller er du, plaget med sur smak i munnen eller sure oppstøt?" inneholder noen av disse alternativene

- "Ja"

**152) Hvor lenge har det vart?**

- Uker

Måneder

Flere år



**153) Har du vært, eller er du, plaget med oppkast?**

- Nei     Ja



## Denne informasjonen vises kun i forhåndsvisningen

Følgende betingelser må være oppfylt for at spørsmålet skal vises for respondenten:

Dersom spørsmålet "Har du vært, eller er du, plaget med oppkast?" inneholder noen av disse alternativene

- "Ja"

### 154) Hvor ofte har du vært, eller er du, plaget med oppkast?

- Daglig
- Noen ganger i uken
- Månedlig
- Sjelden eller aldri

## Denne informasjonen vises kun i forhåndsvisningen

Følgende betingelser må være oppfylt for at spørsmålet skal vises for respondenten:

Dersom spørsmålet "Har du vært, eller er du, plaget med oppkast?" inneholder noen av disse alternativene

- "Ja"

### 155) Hvor lenge har det vart?

- Uker
- Måneder



Flere år



## **ASTMA OG PUSTEBESVÆR**

**156) Har du - de siste 12 månedene - hatt pipende eller hvesende pust?**

- Nei     Ja



## Denne informasjonen vises kun i forhåndsvisningen

Følgende betingelser må være oppfylt for at spørsmålet skal vises for respondenten:

Dersom spørsmålet "Har du - de siste 12 månedene - hatt pipende eller hvesende pust?" inneholder noen av disse alternativene

- "Ja"

**157) Hvor mange ganger har du hatt disse plagene de siste 12 månedene ?**

- 1-3 ganger
- 4-12 ganger
- Mer enn 12 ganger

## Denne informasjonen vises kun i forhåndsvisningen

Følgende betingelser må være oppfylt for at spørsmålet skal vises for respondenten:

Dersom spørsmålet "Har du - de siste 12 månedene - hatt pipende eller hvesende pust?" inneholder noen av disse alternativene

- "Ja"

**158) Har du - de siste 12 månedene - unnlatt å gjøre ting du vil gjøre pga pipende eller hvesende pust?**

- Nei

Ja



## Denne informasjonen vises kun i forhåndsvisningen

Følgende betingelser må være oppfylt for at spørsmålet skal vises for respondenten:

Dersom spørsmålet "Har du - de siste 12 månedene - unnlatt å gjøre ting du vil gjøre pga pipende eller hvesende pust?" inneholder noen av disse alternativene

- "Ja"

**159) Hvor mye har pipende eller hvesende pust hindret deg fra å gjøre ting du har villet gjøre de siste 12 månedene?**

- Lite
- Moderat
- Ganske mye
- Mye



## Denne informasjonen vises kun i forhåndsvisningen

Følgende betingelser må være oppfylt for at spørsmålet skal vises for respondenten:

Dersom spørsmålet "Har du - de siste 12 månedene - hatt pipende eller hvesende pust?" inneholder noen av disse alternativene

- "Ja"

**160) Har du - de siste 12 månedene - hatt vanskelig for å sove, eller våknet pga pipende eller hvesende pust?**

- Nei
- Mindre enn en gang i uken
- 1 eller flere ganger i uken

## Denne informasjonen vises kun i forhåndsvisningen

Følgende betingelser må være oppfylt for at spørsmålet skal vises for respondenten:

Dersom spørsmålet "Har du - de siste 12 månedene - hatt pipende eller hvesende pust?" inneholder noen av disse alternativene

- "Ja"

**161) Har du - de siste 12 månedene - vært borte fra skolen pga pipende eller hvesende pust?**

- Nei
- Ja



## Denne informasjonen vises kun i forhåndsvisningen

Følgende betingelser må være oppfylt for at spørsmålet skal vises for respondenten:

Dersom spørsmålet "Har du - de siste 12 månedene - vært borte fra skolen pga pipende eller hvesende pust?" inneholder noen av disse alternativene

- "Ja"

**162) Hvor mange dager har du vært borte fra skolen pga pipende eller hvesende pust de siste 12 månedene?**

- Mindre enn 5 dager
- 5-10 dager
- Mer enn 10 dager



## Denne informasjonen vises kun i forhåndsvisningen

Følgende betingelser må være oppfylt for at spørsmålet skal vises for respondenten:

Dersom spørsmålet "Har du - de siste 12 månedene - hatt pipende eller hvesende pust?" inneholder noen av disse alternativene

- "Ja"

**163) Har du - de siste 12 månedene - hatt så store plager med pipende eller hvesende pust, at du har hatt behov for å ta nye åndedrag midt i en setning?**

- Nei     Ja





**164) Har du - de siste 12 månedene - hatt pustebesvær (hatt tungt for å puste, kjent deg tett i brystet, hatt pipende eller hvesende pust)?**

Nei     Ja



## Denne informasjonen vises kun i forhåndsvisningen

Følgende betingelser må være oppfylt for at spørsmålet skal vises for respondenten:

Dersom spørsmålet "Har du - de siste 12 månedene - hatt pustebesvær (hatt tungt for å puste, kjent deg tett i brystet, hatt pipende eller hvesende pust)" inneholder noen av disse alternativene

- "Ja"

**165) Dersom du har hatt pustebesvær eller pipende eller hvesende pust de siste 12 månedene, hvor tungt opplevde du at det var å puste? (Marker med et kryss på linjen)**

- 0 Ikke tungt i det hele tatt
- 1
- 2
- 3
- 4
- 5
- 6
- 7
- 8
- 9
- 10 Verst tenkbar



## Denne informasjonen vises kun i forhåndsvisningen

Følgende betingelser må være oppfylt for at spørsmålet skal vises for respondenten:

Dersom spørsmålet "Har du - de siste 12 månedene - hatt pustebesvær (hatt tungt for å puste, kjent deg tett i brystet, hatt pipende eller hvesende pust)" inneholder noen av disse alternativene

- "Ja"

**166) Har du - de siste 12 månedene - hatt pipende eller hvesende pust, tungt for å puste, eller besværlig hoste, i forbindelse med noe av det nedenstående?**

- Nei, har ikke hatt besvær ved noe av dette
- Kald luft eller tåke
- Katt
- Hund
- Hest
- Bjørkepollen
- Gresspollen
- Burotpollen
- Psykisk belastning eller stress
- Tobakksrøyk
- Luftforurensninger
- Sterke dufter
- Mat eller matos

Kald drikke

Annet



## Denne informasjonen vises kun i forhåndsvisningen

Følgende betingelser må være oppfylt for at spørsmålet skal vises for respondenten:

Dersom spørsmålet "Har du - de siste 12 månedene - hatt pustebesvær (hatt tungt for å puste, kjent deg tett i brystet, hatt pipende eller hvesende pust)?" inneholder noen av disse alternativene

- "Ja"

**167) Har du - de siste 12 månedene - hatt pipende eller hvesende pust, tungt for å puste, eller besværlig hoste i forbindelse med anstrengelse?**

- Nei     Ja

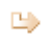

**168) Har du - de siste 12 månedene - brukt noen medisiner for astma eller pustebesvær?**

- Nei     Ja



## Denne informasjonen vises kun i forhåndsvisningen

Følgende betingelser må være oppfylt for at spørsmålet skal vises for respondenten:

Dersom spørsmålet "Har du - de siste 12 månedene - brukt noen medisiner for astma eller pustebesvær?" inneholder noen av disse alternativene

- "Ja"

### 169) Hvilke medisiner for astma eller pustebesvær har du brukt de siste 12 månedene?

|                                                                                                      | Ved behov, eller for en kortere periode, uker av gangen | Over en lengre periode, minst 2 mnd |
|------------------------------------------------------------------------------------------------------|---------------------------------------------------------|-------------------------------------|
| Bricanyl, Ventoline, Airomir, Buventol, Salbutamol Arrow                                             | <input type="radio"/>                                   | <input type="radio"/>               |
| Pulmicort, Flutide, Becotide, Giona Easyhaler, Beklomet, AeroBec autohaler, Budesonid Arrow, Alvesco | <input type="radio"/>                                   | <input type="radio"/>               |
| Symbicort, Seretide                                                                                  | <input type="radio"/>                                   | <input type="radio"/>               |
| Oxis, Serevent, Onbrez Breezehaler                                                                   | <input type="radio"/>                                   | <input type="radio"/>               |
| Atrovent, Ipraxa, Ipratropiumbromid                                                                  | <input type="radio"/>                                   | <input type="radio"/>               |
| Singulair tablett                                                                                    | <input type="radio"/>                                   | <input type="radio"/>               |



## Denne informasjonen vises kun i forhåndsvisningen

Følgende betingelser må være oppfylt for at spørsmålet skal vises for respondenten:

Dersom spørsmålet "Bricanyl, Ventoline, Airomir, Buventol, Salbutamol Arrow" inneholder noen av disse alternativene

- "Over en lengre periode, minst 2 mnd"
- "Ved behov, eller for en kortere periode, noen uker av gangen"

**170) Dersom du bruker luftrørsutvidende medisin (Bricanyl, Ventoline, Airomir, buventol...), hvor ofte bruker du dem i løpet av en vanlig uke?**

- Mindre enn 2 ganger pr uke
- 2 ganger eller mer pr uke





## Denne informasjonen vises kun i forhåndsvisningen

Følgende betingelser må være oppfylt for at spørsmålet skal vises for respondenten:

Dersom spørsmålet "Har du - de siste 12 månedene - brukt noen medisiner for astma eller pustebevisvær?" inneholder noen av disse alternativene

- "Ja"

**171) Har du - de siste 12 månedene - tatt kortisontabletter oppløst i vann (f.eks Betapred) mot astma eller pustebevisvær?**

- Nei     Ja



## Denne informasjonen vises kun i forhåndsvisningen

Følgende betingelser må være oppfylt for at spørsmålet skal vises for respondenten:

Dersom spørsmålet "Har du - de siste 12 månedene - tatt kortison-tabletter oppløst i vann (f.eks Betapred) mot astma eller pustebesvær?" inneholder noen av disse alternativene

- "Ja"

**172) Har du tatt kortison-tabletter oppløst i vann 3 dager i strekk eller mer de siste 12 månedene?**

- Nei     Ja



## Denne informasjonen vises kun i forhåndsvisningen

Følgende betingelser må være oppfylt for at spørsmålet skal vises for respondenten:

Dersom spørsmålet "Har du - de siste 12 månedene - brukt noen medisiner for astma eller pustebesvær?" inneholder noen av disse alternativene

- "Ja"

**173) Har du brukt medisiner for astma eller pustebesvær som er skrevet ut til andre?**

- Nei
- Ja, delvis
- Ja, helt

## Denne informasjonen vises kun i forhåndsvisningen

Følgende betingelser må være oppfylt for at spørsmålet skal vises for respondenten:

Dersom spørsmålet "Har du - de siste 12 månedene - brukt noen medisiner for astma eller pustebesvær?" inneholder noen av disse alternativene

- "Ja"

**174) Har noen andre brukt dine medisiner for astma eller pustebesvær?**

- Nei

Ja, delvis

Ja, helt



## Denne informasjonen vises kun i forhåndsvisningen

Følgende betingelser må være oppfylt for at spørsmålet skal vises for respondenten:

Dersom spørsmålet "Har du - de siste 12 månedene - brukt noen medisiner for astma eller pustebesvær?" inneholder noen av disse alternativene

- "Ja"

**175) Hvor mange inhalatorer av samme merke bruker du å ha samtidig? (men kanskje på ulike steder)**

- 1 inhalator
- 2 inhalatorer
- 3 inhalatorer
- Mer enn 3 inhalatorer

## Denne informasjonen vises kun i forhåndsvisningen

Følgende betingelser må være oppfylt for at spørsmålet skal vises for respondenten:

Dersom spørsmålet "Har du - de siste 12 månedene - brukt noen medisiner for astma eller pustebesvær?" inneholder noen av disse alternativene

- "Ja"

**176) Hvor ofte hender det at du bruker din inhalator til den er tom?**

- Aldri
- Sjelden
- Ofte
- Alltid

## Denne informasjonen vises kun i forhåndsvisningen

Følgende betingelser må være oppfylt for at spørsmålet skal vises for respondenten:

Dersom spørsmålet "Har du - de siste 12 månedene - brukt noen medisiner for astma eller pustebesvær?" inneholder noen av disse alternativene

- "Ja"

**177) Har du fått undervisning om din astmasykdom av sykepleier eller lege? (f.eks hva astma er slags sykdom, hvordan medisinene fungerer og hva du skal gjøre ved forverring)**

- Nei
- Ja

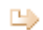

**178) Har du - de siste 12 månedene - hatt tørrhoste om natten uten samtidig å være forkjølet?**

- Nei     Ja

**179) Har du vært plaget av hoste mesteparten av tiden, i minst 3 måneder pr år?**

- Nei
- Ja



## Denne informasjonen vises kun i forhåndsvisningen

Følgende betingelser må være oppfylt for at spørsmålet skal vises for respondenten:

Dersom spørsmålet "Har du vært plaget av hoste mesteparten av tiden, i minst 3 måneder pr år?" inneholder noen av disse alternativene

- "Ja"

**180) Hvor mange år har du vært plaget med hoste mesteparten av tiden, i minst 3 måneder pr år?**

- 1
- 2
- 3
- 4
- 5
- 6
- 7
- 8
- 9
- 10
- 11
- 12
- 13
- 14



- 15
- 16
- 17
- 18
- 19
- 20



**181) Har du vært plaget av slim fra brystet mesteparten av tiden, i minst 3 måneder pr år?**

- Nei
- Ja



## Denne informasjonen vises kun i forhåndsvisningen

Følgende betingelser må være oppfylt for at spørsmålet skal vises for respondenten:

Dersom spørsmålet “Har du vært plaget av slim fra brystet mesteparten av tiden, i minst 3 måneder pr år?” inneholder noen av disse alternativene

- “Ja”

**182) Hvor mange år har du vært plaget med slim fra brystet mesteparten av tiden, i minst 3 måneder pr år?**

- 1
- 2
- 3
- 4
- 5
- 6
- 7
- 8
- 9
- 10
- 11
- 12
- 13
- 14

- 15
- 16
- 17
- 18
- 19
- 20

**183) Om du har pustebesvær eller astma, har det...**

|                                  | Ikke<br>i det<br>hele<br>tatt | Litt                  | En<br>del             | Ganske<br>mye         | Mye                   |
|----------------------------------|-------------------------------|-----------------------|-----------------------|-----------------------|-----------------------|
| hindret deg i skolearbeidet      | <input type="radio"/>         | <input type="radio"/> | <input type="radio"/> | <input type="radio"/> | <input type="radio"/> |
| hindret deg i fritidsaktiviteter | <input type="radio"/>         | <input type="radio"/> | <input type="radio"/> | <input type="radio"/> | <input type="radio"/> |
| uroet deg de siste 4 ukene       | <input type="radio"/>         | <input type="radio"/> | <input type="radio"/> | <input type="radio"/> | <input type="radio"/> |



## **HUDPLAGER OG EKSEM**

**184) Har du noen gang vært plaget av kviser?**

- Ja
- Nei
- Vet ikke



## Denne informasjonen vises kun i forhåndsvisningen

Følgende betingelser må være oppfylt for at spørsmålet skal vises for respondenten:

Dersom spørsmålet "Har du noen gang vært plaget av kviser?" inneholder noen av disse alternativene

- "Ja"

### 185) Hvor mye plaget er du av kviser idag?

- 0 Ingen plager
- 1
- 2
- 3
- 4
- 5
- 6
- 7
- 8
- 9
- 10 Verst tenkelige plager

## Denne informasjonen vises kun i forhåndsvisningen

Følgende betingelser må være oppfylt for at spørsmålet skal vises for respondenten:

Dersom spørsmålet “Har du noen gang vært plaget av kviser?” inneholder noen av disse alternativene

- “Ja”

**186) Har du noen gang oppsøkt lege på grunn av kviser?**

- Ja     Nei





## Denne informasjonen vises kun i forhåndsvisningen

Følgende betingelser må være oppfylt for at spørsmålet skal vises for respondenten:

Dersom spørsmålet "Har du noen gang oppsøkt lege på grunn av kviser?" inneholder noen av disse alternativene

- "Ja"

### 187) Har du fått noen av disse behandlingene av lege?

|                                                    | Ja                    | Nei                   | Vet ikke              |
|----------------------------------------------------|-----------------------|-----------------------|-----------------------|
| Lokalbehandling (f.eks. kremer eller oppløsninger) | <input type="radio"/> | <input type="radio"/> | <input type="radio"/> |
| Antibiotika tabletter (f.eks. Tetracyclin)         | <input type="radio"/> | <input type="radio"/> | <input type="radio"/> |
| Roaccutan tabletter                                | <input type="radio"/> | <input type="radio"/> | <input type="radio"/> |



**188) Har du eller har du noen gang hatt psoriasis?**

- Ja     Nei     Vet ikke



## Denne informasjonen vises kun i forhåndsvisningen

Følgende betingelser må være oppfylt for at spørsmålet skal vises for respondenten:

Dersom spørsmålet "Har du eller har du noen gang hatt psoriasis?" inneholder noen av disse alternativene

- "Ja"

### 189) Hvor gammel var du første gang du fikk psoriasis?

- 10 år eller yngre
- 11 år
- 12 år
- 13 år
- 14 år
- 15 år
- 16 år
- 17 år
- 18 år
- 19 år
- 20 år
- 21 år
- 22 år
- 23 år
- 24 år

- 25 år
- 26 år
- 27 år
- 28 år
- 29 år
- 30 år eller eldre

## Denne informasjonen vises kun i forhåndsvisningen

Følgende betingelser må være oppfylt for at spørsmålet skal vises for respondenten:

Dersom spørsmålet "Har du eller har du noen gang hatt psoriasis?" inneholder noen av disse alternativene

- "Ja"

### 190) Hvor mye plaget er du av psoriasis idag?

- 0 Ingen plager
- 1
- 2
- 3
- 4
- 5
- 6
- 7
- 8
- 9

10 Verst tenkelige plager



Verkebyller er svært store kviser som er ømme/smertefulle og som ofte gir arr.

**191) Har du noen gang hatt verkebyller under armene/armhulene?**

- Ja
- Nei
- Vet ikke

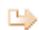

## Denne informasjonen vises kun i forhåndsvisningen

Følgende betingelser må være oppfylt for at spørsmålet skal vises for respondenten:

Dersom spørsmålet "Har du noen gang hatt verkebyller under armene/armhulene?" inneholder noen av disse alternativene

- "Ja"

**192) Har du noen gang oppsøkt lege på grunn av verkebyllene?**

- Ja     Nei



## Denne informasjonen vises kun i forhåndsvisningen

Følgende betingelser må være oppfylt for at spørsmålet skal vises for respondenten:

Dersom spørsmålet "Har du noen gang hatt verkebyller under armene/armhulene?" inneholder noen av disse alternativene

- "Ja"

**193) Har du noen gang hatt verkebyller i lyskene/nært skrittet?**

- Ja
- Nei
- Vet ikke





## Denne informasjonen vises kun i forhåndsvisningen

Følgende betingelser må være oppfylt for at spørsmålet skal vises for respondenten:

Dersom spørsmålet "Har du noen gang hatt verkebyller i lyskene/nært skrittet?" inneholder noen av disse alternativene

- "Ja"

**194) Har du noen gang oppsøkt lege på grunn av verkebyllene?**

- Ja
- Nei



**195) Har du - de siste 12 månedene - hatt plager med tørr hud?**

- Nei     Ja



## Denne informasjonen vises kun i forhåndsvisningen

Følgende betingelser må være oppfylt for at spørsmålet skal vises for respondenten:

Dersom spørsmålet "Har du - de siste 12 månedene - hatt plager med tørr hud?" inneholder noen av disse alternativene

- "Ja"

**196) Har du - de siste 12 månedene - smurt deg med mykgjørende krem/lotion på grunn av tørr hud?**

- Nei
- Ja, mindre enn 1 måned
- Ja, 1-6 måneder
- Ja, mer enn 6 måneder



**197) Har du - de siste 12 månedene - hatt kløende utslett?**

- Nei     Ja



## Denne informasjonen vises kun i forhåndsvisningen

Følgende betingelser må være oppfylt for at spørsmålet skal vises for respondenten:

Dersom spørsmålet "Har du - de siste 12 månedene - hatt kløende utslett?" inneholder noen av disse alternativene

- "Ja"

### 198) Hvor lenge pleier det kløende utslettet å vare?

- Mindre enn 1 uke
- 1-2 uker
- Mer enn 2 uker

## Denne informasjonen vises kun i forhåndsvisningen

Følgende betingelser må være oppfylt for at spørsmålet skal vises for respondenten:

Dersom spørsmålet "Har du - de siste 12 månedene - hatt kløende utslett?" inneholder noen av disse alternativene

- "Ja"

### 199) Hvor har du de kløende utslettene? (Flere alternativer kan krysses av)

- I hodebunnen
- I ansiktet

- I ørene
- På halsen eller i nakken
- På håndledd eller fotledd
- På hendene
- På eller under rumpeballene
- På lårenes innsider
- På brystkasse, mage, rygg eller skuldre
- I armhulene
- På armenes eller benas utsider
- I albuebøyer eller knehaser
- I lysken eller underlivet
- På føttene
- Andre steder

## Denne informasjonen vises kun i forhåndsvisningen

Følgende betingelser må være oppfylt for at spørsmålet skal vises for respondenten:

Dersom spørsmålet "Har du - de siste 12 månedene - hatt kløende utslett?" inneholder noen av disse alternativene

- "Ja"

**200) Hvor gammel var du første gang du fikk denne typen utslett?**

- 0 år
- 1 år
- 2 år

- 3 år
- 4 år
- 5 år
- 6 år
- 7 år
- 8 år
- 9 år
- 10 år
- 11 år
- 12 år
- 13 år
- 14 år
- 15 år
- 16 år
- 17 år
- 18 år eller mer



## Denne informasjonen vises kun i forhåndsvisningen

Følgende betingelser må være oppfylt for at spørsmålet skal vises for respondenten:

Dersom spørsmålet "Har du - de siste 12 månedene - hatt kløende utslett?" inneholder noen av disse alternativene

- "Ja"

**201) I hvilken periode i løpet av året har du hatt kløende utslett de siste 12 månedene?**

- Januar
- Februar
- Mars
- April
- Mai
- Juni
- Juli
- August
- September
- Oktober
- November
- Desember

Denne informasjonen vises kun i forhåndsvisningen



Følgende betingelser må være oppfylt for at spørsmålet skal vises for respondenten:

Dersom spørsmålet "Har du - de siste 12 månedene - hatt kløende utslett?" inneholder noen av disse alternativene

- "Ja"

**202) Har det kløende utslettet forsvunnet helt ved noe tidspunkt de siste 12 månedene?**

- Nei     Ja

## Denne informasjonen vises kun i forhåndsvisningen

Følgende betingelser må være oppfylt for at spørsmålet skal vises for respondenten:

Dersom spørsmålet "Har du - de siste 12 månedene - hatt kløende utslett?" inneholder noen av disse alternativene

- "Ja"

**203) Har du - de siste 12 månedene - hatt vanskelig for å få sove, eller våknet pga kløende utslett?**

- Nei
- Mindre enn 1 gang pr uke
- 1 eller flere ganger pr uke



## Denne informasjonen vises kun i forhåndsvisningen

Følgende betingelser må være oppfylt for at spørsmålet skal vises for respondenten:

Dersom spørsmålet "Har du - de siste 12 månedene - hatt kløende utslett?" inneholder noen av disse alternativene

- "Ja"

**204) Har du - den siste uken - hatt kløende utslett?**

- Nei     Ja



## Denne informasjonen vises kun i forhåndsvisningen

Følgende betingelser må være oppfylt for at spørsmålet skal vises for respondenten:

Dersom spørsmålet "Har du - den siste uken - hatt kløende utslett?" inneholder noen av disse alternativene

- "Ja"

**205) I løpet av den siste uken, hvor mye har huden din klødd eller føltes smertefull?**

- Veldig mye
- Ganske mye
- Litt
- Ikke i det hele tatt

## Denne informasjonen vises kun i forhåndsvisningen

Følgende betingelser må være oppfylt for at spørsmålet skal vises for respondenten:

Dersom spørsmålet "Har du - den siste uken - hatt kløende utslett?" inneholder noen av disse alternativene

- "Ja"

**206) I løpet av den siste uken, hvor plaget, trist eller lei deg, har du vært pga huden?**

- Veldig mye
- Ganske mye
- Litt
- Ikke i det hele tatt

## Denne informasjonen vises kun i forhåndsvisningen

Følgende betingelser må være oppfylt for at spørsmålet skal vises for respondenten:

Dersom spørsmålet "Har du - den siste uken - hatt kløende utslett?" inneholder noen av disse alternativene

- "Ja"

**207) I løpet av den siste uken, har huden din påvirket hvordan det har vært å være sammen med dine venner?**

- Veldig mye
- Ganske mye
- Litt
- Ikke i det hele tatt



## Denne informasjonen vises kun i forhåndsvisningen

Følgende betingelser må være oppfylt for at spørsmålet skal vises for respondenten:

Dersom spørsmålet "Har du - den siste uken - hatt kløende utslett?" inneholder noen av disse alternativene

- "Ja"

**208) I løpet av den siste uken, har du byttet eller hatt på deg andre eller spesielle klær/sko på grunn av din hud?**

- Veldig mye
- Ganske mye
- Litt
- Ikke i det hele tatt

## Denne informasjonen vises kun i forhåndsvisningen

Følgende betingelser må være oppfylt for at spørsmålet skal vises for respondenten:

Dersom spørsmålet "Har du - den siste uken - hatt kløende utslett?" inneholder noen av disse alternativene

- "Ja"

**209) I løpet av den siste uken, har dine hudplager påvirket deg når det gjelder å gå ut eller holde på med dine hobbyer?**

- Veldig mye
- Ganske mye
- Litt
- Ikke i det hele tatt

## Denne informasjonen vises kun i forhåndsvisningen

Følgende betingelser må være oppfylt for at spørsmålet skal vises for respondenten:

Dersom spørsmålet "Har du - den siste uken - hatt kløende utslett?" inneholder noen av disse alternativene

- "Ja"

**210) I løpet av den siste uken, har du unngått svømming eller annen trening pga dine hudplager?**

- Veldig mye
- Ganske mye
- Litt
- Ikke i det hele tatt



## Denne informasjonen vises kun i forhåndsvisningen

Følgende betingelser må være oppfylt for at spørsmålet skal vises for respondenten:

Dersom spørsmålet "Har du - den siste uken - hatt kløende utslett?" inneholder noen av disse alternativene

- "Ja"

**211) I løpet av den siste uken, har huden din påvirket ditt skolearbeid?**

- Veldig mye
- Ganske mye
- Litt
- Ikke i det hele tatt

## Denne informasjonen vises kun i forhåndsvisningen

Følgende betingelser må være oppfylt for at spørsmålet skal vises for respondenten:

Dersom spørsmålet "Har du - den siste uken - hatt kløende utslett?" inneholder noen av disse alternativene

- "Ja"

**212) Dersom du har hatt ferie: I løpet av den siste uken, har dine hudplager hindret deg i å nyte ferien?**

- Veldig mye

- Ganske mye
- Litt
- Ikke i det hele tatt

## Denne informasjonen vises kun i forhåndsvisningen

Følgende betingelser må være oppfylt for at spørsmålet skal vises for respondenten:

Dersom spørsmålet "Har du - den siste uken - hatt kløende utslett?" inneholder noen av disse alternativene

- "Ja"

**213) I løpet av den siste uken, hvor mye plager har du hatt pga din hud fordi andre personer har gitt deg tilnavn, ertet deg, mobbet deg, stilt spørsmål eller unngått deg?**

- Veldig mye
- Ganske mye
- Litt
- Ikke i det hele tatt





## Denne informasjonen vises kun i forhåndsvisningen

Følgende betingelser må være oppfylt for at spørsmålet skal vises for respondenten:

Dersom spørsmålet "Har du - den siste uken - hatt kløende utslett?" inneholder noen av disse alternativene

- "Ja"

**214) I løpet av den siste uken, hvor mye har din søvn blitt påvirket av dine hudplager?**

- Veldig mye
- Ganske mye
- Litt
- Ikke i det hele tatt

## Denne informasjonen vises kun i forhåndsvisningen

Følgende betingelser må være oppfylt for at spørsmålet skal vises for respondenten:

Dersom spørsmålet "Har du - den siste uken - hatt kløende utslett?" inneholder noen av disse alternativene

- "Ja"

**215) I løpet av den siste uken, hvor mye problem har du hatt med behandlingen av huden din?**

- Veldig mye
- Ganske mye
- Litt
- Ikke i det hele tatt

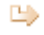

**216) Har du - de siste 12 månedene - hatt eksem?**

- Nei     Ja



## Denne informasjonen vises kun i forhåndsvisningen

Følgende betingelser må være oppfylt for at spørsmålet skal vises for respondenten:

Dersom spørsmålet "Har du - de siste 12 månedene - hatt eksem?" inneholder noen av disse alternativene

- "Ja"

### 217) Hvor lenge har du tilsammen hatt eksem de siste 12 månedene?

- Mindre enn 1 måned
- 1-3 måneder
- 4-6 måneder
- Mer enn 6 måneder

## Denne informasjonen vises kun i forhåndsvisningen

Følgende betingelser må være oppfylt for at spørsmålet skal vises for respondenten:

Dersom spørsmålet "Har du - de siste 12 månedene - hatt eksem?" inneholder noen av disse alternativene

- "Ja"

### 218) Har du smurt deg med kortison pga eksem de siste 12 månedene?

- Nei
- Ja, mindre enn 1 måned

- Ja, 1-6 måneder
- Ja, mer enn 6 måneder



**219) Har du noen gang hatt håndeksem? (Kløende forandring i huden, blemmer eller kløende utslett)**

- Nei     Ja



## Denne informasjonen vises kun i forhåndsvisningen

Følgende betingelser må være oppfylt for at spørsmålet skal vises for respondenten:

Dersom spørsmålet "Har du noen gang hatt håndeksem? (Kløende forandring i huden, blemmer eller kløende utslett)" inneholder noen av disse alternativene

- "Ja"

### 220) Hvor gammel var du da håndeksemet begynte?

- 0 år
- 1 år
- 2 år
- 3 år
- 4 år
- 5 år
- 6 år
- 7 år
- 8 år
- 9 år
- 10 år
- 11 år
- 12 år
- 13 år
- 14 år

- 15 år
- 16 år
- 17 år
- 18 år
- 19 år
- 20 år

## Denne informasjonen vises kun i forhåndsvisningen

Følgende betingelser må være oppfylt for at spørsmålet skal vises for respondenten:

Dersom spørsmålet "Har du noen gang hatt håndeksem? (Kløende forandring i huden, blemmer eller kløende utslett)" inneholder noen av disse alternativene

- "Ja"

**221) Har du - de siste 12 månedene - ved noen anledning hatt håndeksem?**

- Nei     Ja





## Denne informasjonen vises kun i forhåndsvisningen

Følgende betingelser må være oppfylt for at spørsmålet skal vises for respondenten:

Dersom spørsmålet "Har du - de siste 12 månedene - ved noen anledning hatt håndeksem?" inneholder noen av disse alternativene

- "Ja"

### 222) Hvor mye plaget er du av håndeksem i dag?

- 0 Ingen plager
- 1
- 2
- 3
- 4
- 5
- 6
- 7
- 8
- 9
- 10 Verst tenkelige plager

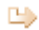

**223) Hvor mange ganger kommer hendene dine i kontakt med vann i løpet av en dag? (ikke tell med den tiden du beskytter hendene med hansker)**

- Ingen ganger pr dag
- 1-10 ganger pr dag
- 11-20 ganger pr dag
- 21-30 ganger pr dag
- Mer enn 30 ganger pr dag

**224) Har du - noen gang - fått kløende utslett eller eksem (rødhet, blemmer eller flassing) av sminke eller hygieneprodukter?**

- Nei
- Ja



## Denne informasjonen vises kun i forhåndsvisningen

Følgende betingelser må være oppfylt for at spørsmålet skal vises for respondenten:

Dersom spørsmålet "Har du - noen gang - fått kløende utslett eller eksem (rødhet, blemmer eller flassing) av sminke eller hygieneprodukter?" inneholder noen av disse alternativene

- "Ja"

### 225) Av hva har du fått plager?

- Sminke eller parfyme
- Deodorant
- Shampo eller balsam
- Såpe eller dusjkrem
- Annet



**226) Har du - noen gang - farget håret? (farget, tonet, bleket eller stripet håret ditt, hjemme eller hos frisør)**

- Nei     Ja



## Denne informasjonen vises kun i forhåndsvisningen

Følgende betingelser må være oppfylt for at spørsmålet skal vises for respondenten:

Dersom spørsmålet "Har du - noen gang - farget håret? (farget, tonet, bleket eller stripet håret ditt, hjemme eller hos frisør)" inneholder noen av disse alternativene

- "Ja"

**227) Har du noen gang fått plager ved hårfarging?**

- Nei     Ja



## Denne informasjonen vises kun i forhåndsvisningen

Følgende betingelser må være oppfylt for at spørsmålet skal vises for respondenten:

Dersom spørsmålet "Har du noen gang fått plager ved hårfarging?" inneholder noen av disse alternativene

- "Ja"

### 228) På hvilken måte har du reagert når du har farget håret?

- Reaksjon i ansiktet, hodebunn, på ørene eller halsen (rødhet, flassing, kløe)
- Kraftig reaksjon i ansiktet, hodebunn, på ørene eller halsen (hevelse, væskende utslett)
- Reaksjon på hendene (rødhet, flassing, kløe)
- Annet



**229) Har du - noen gang - fått kløende utslett eller eksem (rødhet, blemmer eller flassing) av latex eller gummi (ballonger, gummihansker, kondomer...)?**

- Nei     Ja



## Denne informasjonen vises kun i forhåndsvisningen

Følgende betingelser må være oppfylt for at spørsmålet skal vises for respondenten:

Dersom spørsmålet "Har du - noen gang - fått kløende utslett eller eksem (rødhet, blemmer eller flassing) av latex eller gummi (ballonger, gummihansker, kondomer...)" inneholder noen av disse alternativene

- "Ja"

### 230) Av hvilke latex-/gummiprodukter har du fått plager?

- Ballonger ved ballongblåsing
- Gummihansker
- Kondomer
- Annet





**231) Har du - noen gang - tatt hull i ørene eller laget hull for smykker noen andre steder på kroppen?**

- Nei     Ja

**232) Har du noen tatovering?**

- Nei     Ja



## Denne informasjonen vises kun i forhåndsvisningen

Følgende betingelser må være oppfylt for at spørsmålet skal vises for respondenten:

Dersom spørsmålet "Har du noen tatovering?" inneholder noen av disse alternativene

- "Ja"

**233) Har du noen gang fått kløende utslett eller eksem (rødhet, blemmer eller flassing) av din tatovering?**

- Nei     Ja



**234) Har du - noen gang - fått kløende utslett eller eksem (rødhet, blemmer eller flassing) av metallgjenstander?**

- Nei     Ja



## Denne informasjonen vises kun i forhåndsvisningen

Følgende betingelser må være oppfylt for at spørsmålet skal vises for respondenten:

Dersom spørsmålet "Har du - noen gang - fått kløende utslett eller eksem (rødhet, blemmer eller flassing) av metallgjenstander?"

inneholder noen av disse alternativene

- "Ja"

### 235) Av hva har du fått kløende utslett eller eksem?

- Armbånd, halsbånd, fingerring eller annet
- Smykke (unntatt smykker for hull)
- Smykker for hull
- Knapp, nål, spenne, glidelås eller liknende i sko eller støvler
- Klokke eller klokkereim
- Briller eller solbriller
- Hårspenner eller liknende
- Mobiltelefon
- Øretelefon
- Annet

**236) Dersom du har hudbesvær eller eksem, har det...**

|                                          | Ikke<br>i det<br>hele<br>tatt | Litt                  | En<br>del             | Ganske<br>mye         | Mye                   |
|------------------------------------------|-------------------------------|-----------------------|-----------------------|-----------------------|-----------------------|
| Hindret deg i skolearbeidet              | <input type="radio"/>         | <input type="radio"/> | <input type="radio"/> | <input type="radio"/> | <input type="radio"/> |
| Hindret deg i fritidsaktiviteter         | <input type="radio"/>         | <input type="radio"/> | <input type="radio"/> | <input type="radio"/> | <input type="radio"/> |
| Bekymret (Uroet) deg de siste fire ukene | <input type="radio"/>         | <input type="radio"/> | <input type="radio"/> | <input type="radio"/> | <input type="radio"/> |



## **NESE- ELLER ØYEPLAGER**

**237) Har du - de siste 12 månedene - hatt nysing, kløende nese, rennende nese eller tett nese uten at du samtidig har vært forkjølet?**

- Nei     Ja



## Denne informasjonen vises kun i forhåndsvisningen

Følgende betingelser må være oppfylt for at spørsmålet skal vises for respondenten:

Dersom spørsmålet "Har du - de siste 12 månedene - hatt nysing, kløende nese, rennende nese eller tett nese uten at du samtidig har vært forkjølet?" inneholder noen av disse alternativene

- "Ja"

**238) Har du hatt nysing, kløende nese, rennende nese eller tett nese i mer en 4 dager uten at du samtidig har vært forkjølet i de siste 12 månedene?**

- Nei     Ja



## Denne informasjonen vises kun i forhåndsvisningen

Følgende betingelser må være oppfylt for at spørsmålet skal vises for respondenten:

Dersom spørsmålet "Har du hatt nysing, kløende nese, rennende nese eller tett nese i mer en 4 dager uten at du samtidig har vært forkjølet i de siste 12 månedene?" inneholder noen av disse alternativene

- "Ja"

**239) Skjedde dette over 4 uker i strekk de siste 12 månedene?**

- Nei     Ja

## Denne informasjonen vises kun i forhåndsvisningen

Følgende betingelser må være oppfylt for at spørsmålet skal vises for respondenten:

Dersom spørsmålet "Har du hatt nysing, kløende nese, rennende nese eller tett nese i mer en 4 dager uten at du samtidig har vært forkjølet i de siste 12 månedene?" inneholder noen av disse alternativene

- "Ja"

**240) Hvor lenge har du hatt disse plagene uten samtidig å være forkjølet de siste 12 månedene?**

- Mindre enn 1 måned



- 1-3 måneder
- 3-6 måneder
- Mer enn 6 måneder



## Denne informasjonen vises kun i forhåndsvisningen

Følgende betingelser må være oppfylt for at spørsmålet skal vises for respondenten:

Dersom spørsmålet "Har du - de siste 12 månedene - hatt nysing, kløende nese, rennende nese eller tett nese uten at du samtidig har vært forkjølet?" inneholder noen av disse alternativene

- "Ja"

**241) Har disse neseplagene - de siste 12 månedene - forekommet samtidig med kløende, rennende øyne?**

- Nei     Ja

## Denne informasjonen vises kun i forhåndsvisningen

Følgende betingelser må være oppfylt for at spørsmålet skal vises for respondenten:

Dersom spørsmålet "Har du - de siste 12 månedene - hatt nysing, kløende nese, rennende nese eller tett nese uten at du samtidig har vært forkjølet?" inneholder noen av disse alternativene

- "Ja"

**242) I løpet av hvilken periode har du hatt plager med nysing, kløende nese, rennende nese eller tett nese de siste 12 månedene?**

- Januar
- Februar

- Mars
- April
- Mai
- Juni
- Juli
- August
- September
- Oktober
- November
- Desember



**243) Har du hatt nese- eller øyeplager, uten å være forkjølet, ved kontakt med noe av det nedenstående de siste 12 månedene?**

- Nei, har ikke hatt besvær med noen av disse
- Katt
- Hund
- Hest
- Kanin, marsvin eller andre gnagere
- Bjørkepollen
- Gresspollen
- Burotpollen
- Tobakksrøyk
- Luftforurensninger
- Sterke dufter
- Annet

**244) Har du unnlatt å gjøre ting du har villet gjøre pga neseplager de siste 12 månedene?**

- Nei     Ja



## Denne informasjonen vises kun i forhåndsvisningen

Følgende betingelser må være oppfylt for at spørsmålet skal vises for respondenten:

Dersom spørsmålet “Har du unnlatt å gjøre ting du har villet gjøre pga neseplager de siste 12 månedene?” inneholder noen av disse alternativene

- “Ja”

**245) Hvor mye har neseplagene påvirket at du har unnlatt å gjøre ting du har villet gjøre de siste 12 månedene?**

- Litt
- Moderat
- Ganske mye
- Mye



**246) Har du hatt vanskelig for å sove pga neseplager de siste 12 månedene?**

- Nei     Ja

**247) Har du - de siste 12 månedene - tatt noen medisiner for allergisnue/høysnue?**

- Nei     Ja



## Denne informasjonen vises kun i forhåndsvisningen

Følgende betingelser må være oppfylt for at spørsmålet skal vises for respondenten:

Dersom spørsmålet "Har du - de siste 12 månedene - tatt noen medisiner for allergisnue/høysnue?" inneholder noen av disse alternativene

- "Ja"

**248) Hvilke medisiner for allergisnue/høysnue har du brukt de siste 12 månedene?**

- Øyedråper
- Nesespray
- Allergitabletter
- Andre



**249) Dersom du har hatt neseplager, allergisnue/høysnue, hvor plagsomt opplevde du at det var de siste 12 månedene?**

- 0 Ingen plager
- 1
- 2
- 3
- 4
- 5
- 6
- 7
- 8
- 9
- 10 Verst tenkelige plager



**250) Har du - de siste 12 månedene - vært tett i nesen?**

- Nei
- Mindre enn 10 dager
- 10 dager - 12 uker
- 12 uker eller mer

**251) Har du - de siste 12 månedene - hatt gulgrønt slim eller snørr bak i halsen?**

- Nei
- Mindre enn 10 dager
- 10 dager - 12 uker
- 12 uker eller mer

**252) Har du - de siste 12 månedene - hatt nedsatt luktesans?**

- Nei
- Mindre enn 10 dager
- 10 dager - 12 uker
- 12 uker eller mer

**253) Har du - de siste 12 månedene - opplevd smerter eller trykk ved eller omkring pannen, nesen eller øynene?**

- Nei
- Mindre enn 10 dager
- 10 dager - 12 uker
- 12 uker eller mer



## Denne informasjonen vises kun i forhåndsvisningen

Følgende betingelser må være oppfylt for at spørsmålet skal vises for respondenten:

Dersom spørsmålet "Har du - de siste 12 månedene - vært tett i nesen?" inneholder noen av disse alternativene

- "12 uker eller mer"
- "10 dager - 12 uker"
- "Mindre enn 10 dager"

eller

Dersom spørsmålet "Har du - de siste 12 månedene - hatt gulgrønt slim eller snørr bak i halsen?" inneholder noen av disse alternativene

- "12 uker eller mer"
- "10 dager - 12 uker"
- "Mindre enn 10 dager"

eller

Dersom spørsmålet "Har du - de siste 12 månedene - hatt nedsatt luktesans?" inneholder noen av disse alternativene

- "12 uker eller mer"
- "10 dager - 12 uker"
- "Mindre enn 10 dager"

eller

Dersom spørsmålet "Har du - de siste 12 månedene - opplevd smerter eller trykk ved eller omkring pannen, nesen eller øynene?" inneholder noen av disse alternativene

- "12 uker eller mer"
- "10 dager - 12 uker"
- "Mindre enn 10 dager"

**254) Dersom du har hatt nesetetthet, snue, nedsatt luktesans eller smerter i ansiktet, hvor plagsomt synes du det var de siste 12 månedene?**

- 0 Ikke plagsomt i det hele tatt
- 1
- 2
- 3
- 4
- 5
- 6
- 7
- 8
- 9
- 10 Verst tenkelig

**255) Dersom du har hatt nese- eller øyeplager, har det...**

|                                  | Ikke<br>i det<br>hele<br>tatt | Litt                  | En<br>del             | Ganske<br>mye         | Mye                   |
|----------------------------------|-------------------------------|-----------------------|-----------------------|-----------------------|-----------------------|
| Hindret deg i skolearbeid        | <input type="radio"/>         | <input type="radio"/> | <input type="radio"/> | <input type="radio"/> | <input type="radio"/> |
| Hindret deg i fritidsaktiviteter | <input type="radio"/>         | <input type="radio"/> | <input type="radio"/> | <input type="radio"/> | <input type="radio"/> |
| Bekymret deg de siste 4 uker     | <input type="radio"/>         | <input type="radio"/> | <input type="radio"/> | <input type="radio"/> | <input type="radio"/> |



## **Reaksjoner på mat**

**256) Har du - de siste 12 månedene - reagert på noe i maten?**

- Nei     Ja



## Denne informasjonen vises kun i forhåndsvisningen

Følgende betingelser må være oppfylt for at spørsmålet skal vises for respondenten:

Dersom spørsmålet "Har du - de siste 12 månedene - reagert på noe i maten?" inneholder noen av disse alternativene

- "Ja"

### 257) Har du reagert på noen av de nedenstående matvarene de siste 12 månedene?

- Melk - protein
- Melk - laktose
- Egg
- Fisk
- Skalldyr
- Hvete, andre kornslag
- Soya
- Sesam
- Eple, pære
- Fersken, nektarin, plommer, kirsebær
- Kiwi
- Banan
- Rå gulrot
- Peanøtter
- Hasselnøtter

- Mandel
- Valnøtt, pekannøtt
- Cashewnøtt, pistasjnøtt
- Paranøtt
- Annet



## Denne informasjonen vises kun i forhåndsvisningen

Følgende betingelser må være oppfylt for at spørsmålet skal vises for respondenten:

Dersom spørsmålet "Har du reagert på noen av de nedenstående matvarene de siste 12 månedene?" inneholder noen av disse alternativene

- "Fisk"

### 258) Dersom du reagerer på fisk, hvilke(n) reaksjon(er) får du?

- Kløende utslett
- Hevelse i og rundt munnen
- Hevelse i ansiktet
- Slim i halsen
- Oppkast
- Diare
- Tungpust
- Svimmelhet
- Besvimelse/allergisjokk

## Denne informasjonen vises kun i forhåndsvisningen

Følgende betingelser må være oppfylt for at spørsmålet skal vises for respondenten:



Dersom spørsmålet “Har du reagert på noen av de nedenstående matvarene de siste 12 månedene?” inneholder noen av disse alternativene

- “Fisk”

**259) Dersom du reagerer på fisk, reagerer du ved å...**

- Spise fisk
- Ta på fisk
- Puste inn damp fra fisk som kokes eller stekes



**260) Dersom du ikke reagerer på fisk nå, har du:**

- Reagert på fisk tidligere
- Aldri reagert på fisk



## Denne informasjonen vises kun i forhåndsvisningen

Følgende betingelser må være oppfylt for at spørsmålet skal vises for respondenten:

- Dersom spørsmålet “Dersom du ikke reagerer på fisk nå, har du:” inneholder noen av disse alternativene
- “Reagert på fisk tidligere”

**261) Dersom du tidligere har reagert på fisk, hvilke(n) reaksjon(er) fikk du da?**

- Kløende utslett
- Hevelse i og rundt munnen
- Hevelse i ansiktet
- Slim i halsen
- Oppkast
- Diare
- Tungpust
- Svimmelhet
- Besvimelse/allergisjokk



## Denne informasjonen vises kun i forhåndsvisningen

Følgende betingelser må være oppfylt for at spørsmålet skal vises for respondenten:

Dersom spørsmålet "Har du - de siste 12 månedene - reagert på noe i maten?" inneholder noen av disse alternativene

- "Ja"

**262) Har du en adrenalinsprøyte (EpiPen, Anapen, Jext) som du kan ta, dersom du reagerer på noe i maten?**

- Nei     Ja



## Denne informasjonen vises kun i forhåndsvisningen

Følgende betingelser må være oppfylt for at spørsmålet skal vises for respondenten:

Dersom spørsmålet "Har du en adrenalinsprøyte (Epipen, Anapen, Jext) som du kan ta, dersom du reagerer på noe i maten?"

inneholder noen av disse alternativene

- "Ja"

**263) Har du - noen gang - brukt sprøyten?**

- Nei     Ja

## Denne informasjonen vises kun i forhåndsvisningen

Følgende betingelser må være oppfylt for at spørsmålet skal vises for respondenten:

Dersom spørsmålet "Har du en adrenalinsprøyte (Epipen, Anapen, Jext) som du kan ta, dersom du reagerer på noe i maten?"

inneholder noen av disse alternativene

- "Ja"

**264) Har du - de siste 12 månedene - brukt sprøyten?**

- Nei     Ja



## Denne informasjonen vises kun i forhåndsvisningen

Følgende betingelser må være oppfylt for at spørsmålet skal vises for respondenten:

Dersom spørsmålet "Har du - de siste 12 månedene - reagert på noe i maten?" inneholder noen av disse alternativene

- "Ja"

### 265) Dersom du får plager av matvarer, har det...

|                                  | Ikke<br>i det<br>hele<br>tatt | Litt                  | En del                | Ganske<br>mye         | Mye                   |
|----------------------------------|-------------------------------|-----------------------|-----------------------|-----------------------|-----------------------|
| Hindret deg i skolearbeid        | <input type="radio"/>         | <input type="radio"/> | <input type="radio"/> | <input type="radio"/> | <input type="radio"/> |
| Hindret deg i fritidsaktiviteter | <input type="radio"/>         | <input type="radio"/> | <input type="radio"/> | <input type="radio"/> | <input type="radio"/> |
| Bekymret deg de siste 4 ukene    | <input type="radio"/>         | <input type="radio"/> | <input type="radio"/> | <input type="radio"/> | <input type="radio"/> |

**Send**

100 % fullført

© Copyright [www.questback.com](http://www.questback.com). All Rights Reserved.
